# Supplementary material for: Synthesis of Shape-Memory Polyurethanes: Combined Experimental and Simulation Studies
Source: MDPI journal article supplement (doi:10.3390/ijms23137064), 2022-06-25
Supplement: s1 [file s1]

## SUPPLEMENTARY MATERIALS

# Synthesis of shape-memory polyurethanes: combined experimental and simulation studies

Karolina Rolińska<sup>\*a,b</sup>, Magdalena Mazurek-Budzyńska<sup>a</sup>, Paweł G. Parzuchowski<sup>a</sup>, Dominik Wołosz<sup>a</sup>, Maria Balk<sup>c</sup>, Krzysztof Gorący<sup>d</sup>, Mirosława El Fray<sup>d</sup>, Piotr Polanowski<sup>e</sup>, Andrzej Sikorski<sup>b</sup>

<sup>a</sup> Faculty of Chemistry, Warsaw University of Technology, ul. Noakowskiego 3, 00-664 Warsaw, Poland;

<sup>b</sup> Faculty of Chemistry, University of Warsaw, ul. Pasteura 1, 02-093 Warsaw, Poland;

<sup>c</sup> Institute of Active Polymers, Helmholtz-Zentrum Hereon, Kantstraße 55, Teltow 14513, Germany;

<sup>d</sup> Faculty of Chemical Technology and Engineering, West Pomeranian University of Technology, Szczecin, Piastów Avenue 42, 71-065 Szczecin, Poland;

<sup>e</sup> Faculty of Chemistry, Technical University of Lodz, Zeromskiego 116, 90-924 Lodz, Poland;

*\* Corresponding author.*

*E-mail address:* [karolina.rolinska.dokt@pw.edu.pl](mailto:karolina.rolinska.dokt@pw.edu.pl)

## FTIR and NMR spectra of synthesized products

### E\_BMC\_8

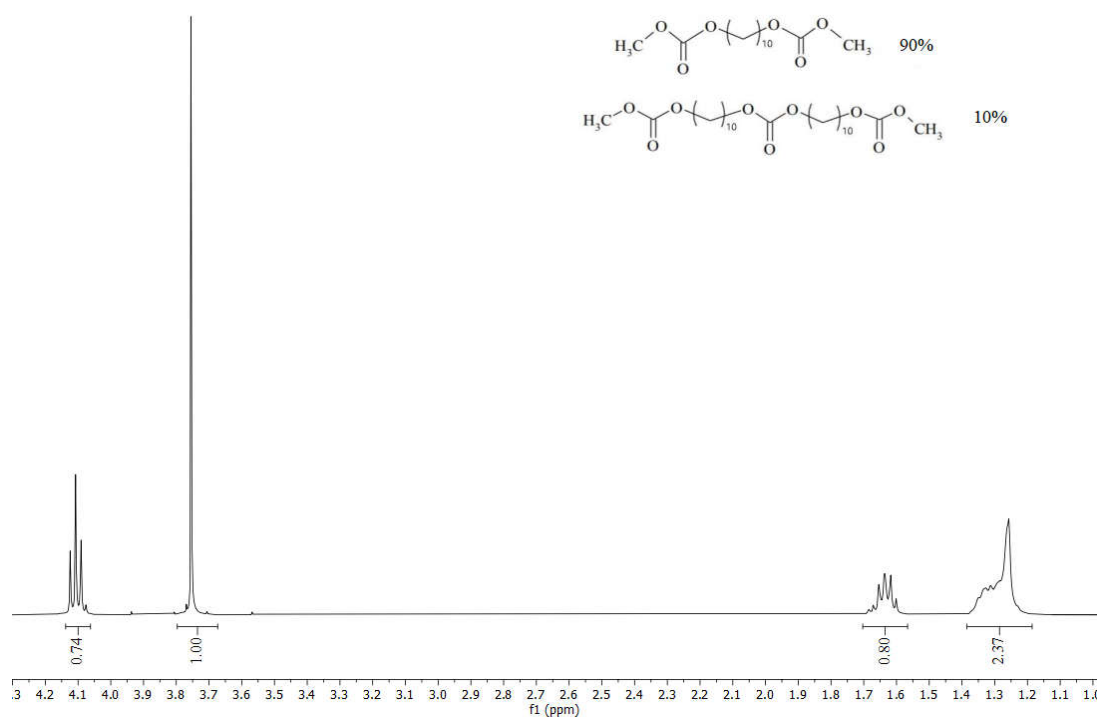

Figure S1 <sup>1</sup>H NMR spectrum of the E\_BMC\_8.

### E\_BMC\_10

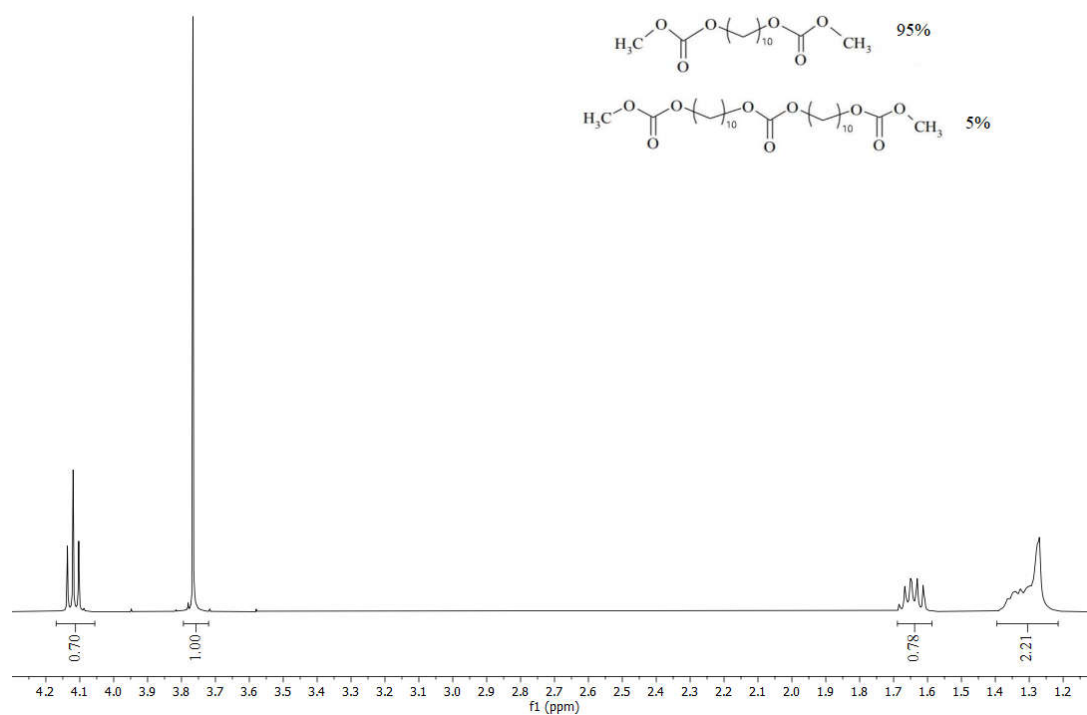

Figure S2 <sup>1</sup>H NMR spectrum of the E\_BMC\_10.

## E\_BMC\_18

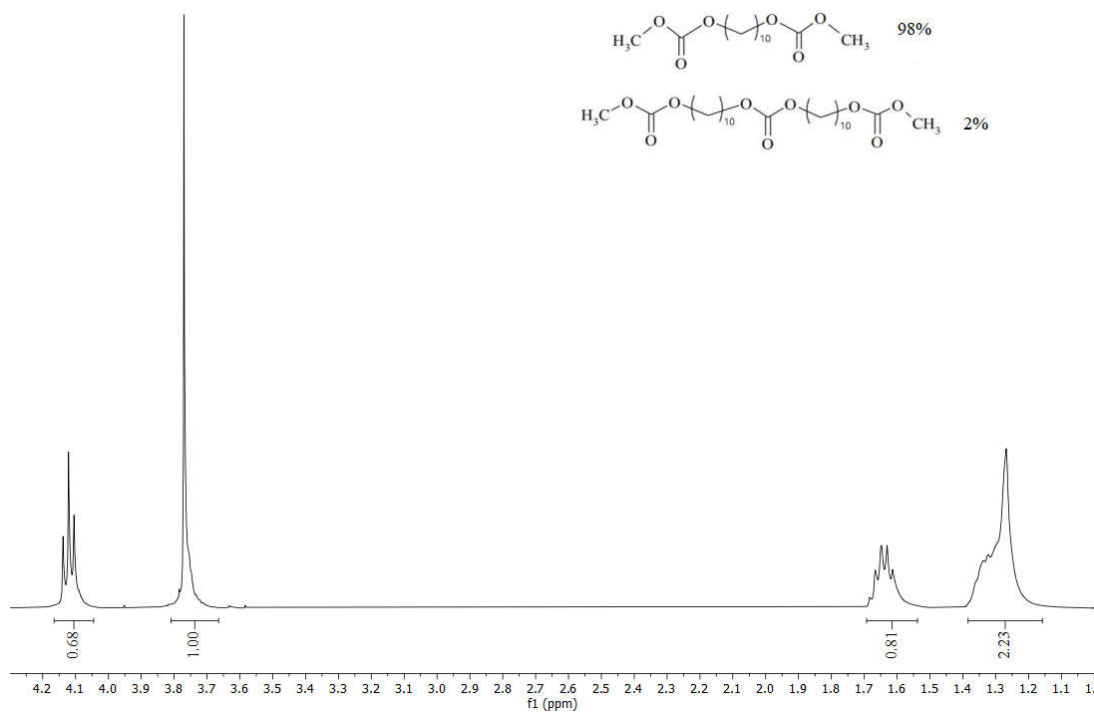

Figure S3  $^1\text{H}$  NMR spectrum of the E\_BMC\_18.

## E\_BMC\_8

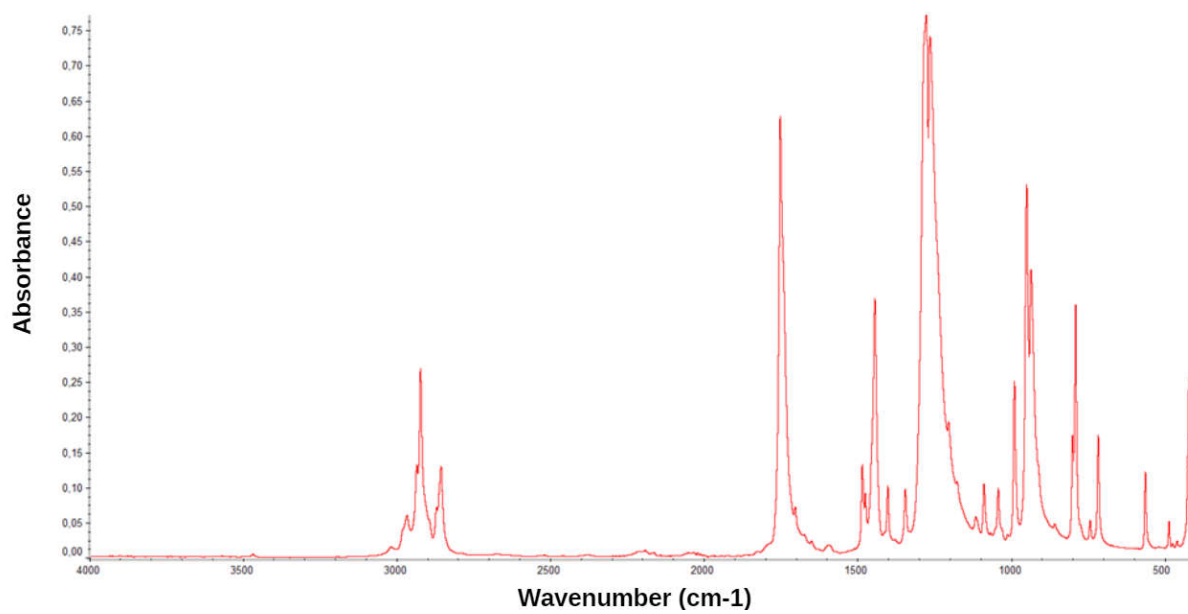

Figure S4 FTIR spectra of E\_BMC\_8.

## E\_BMC\_10

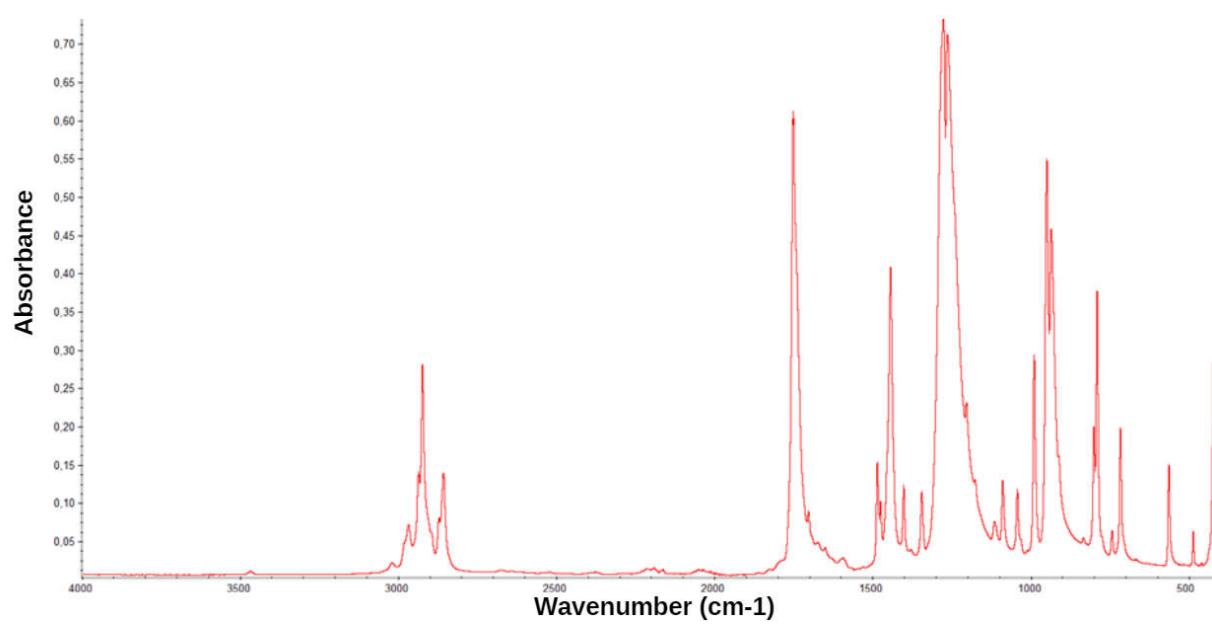

Figure S5 FTIR spectra of E\_BMC\_10.

## E\_BMC\_18

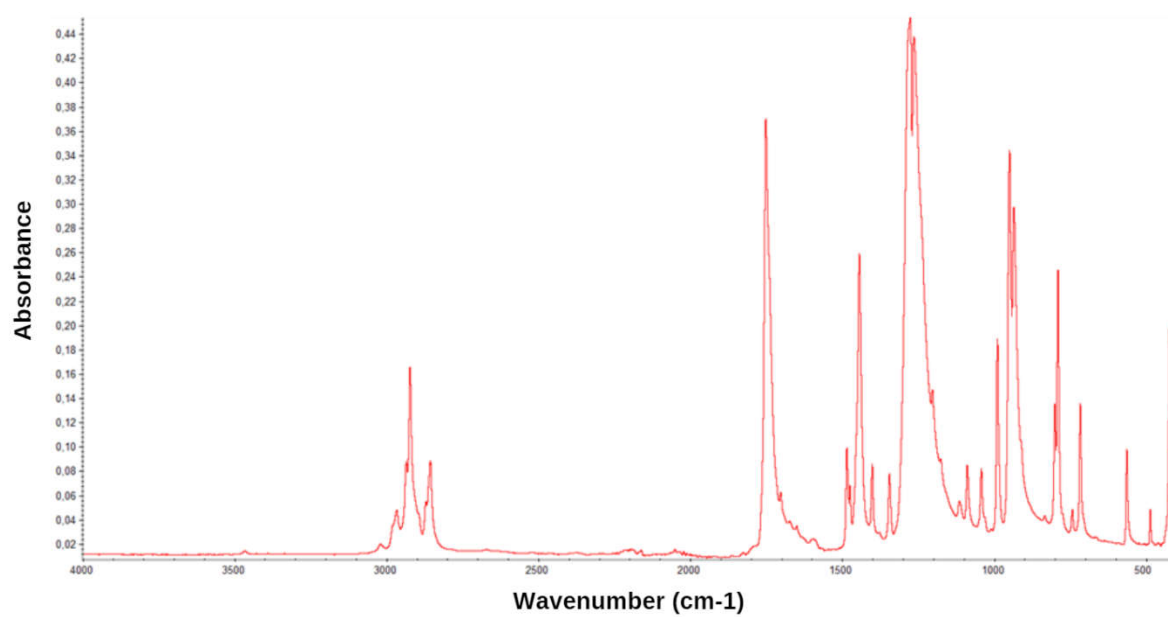

Figure S6 FTIR spectra of E\_BMC\_18.

## E\_OCD\_3000

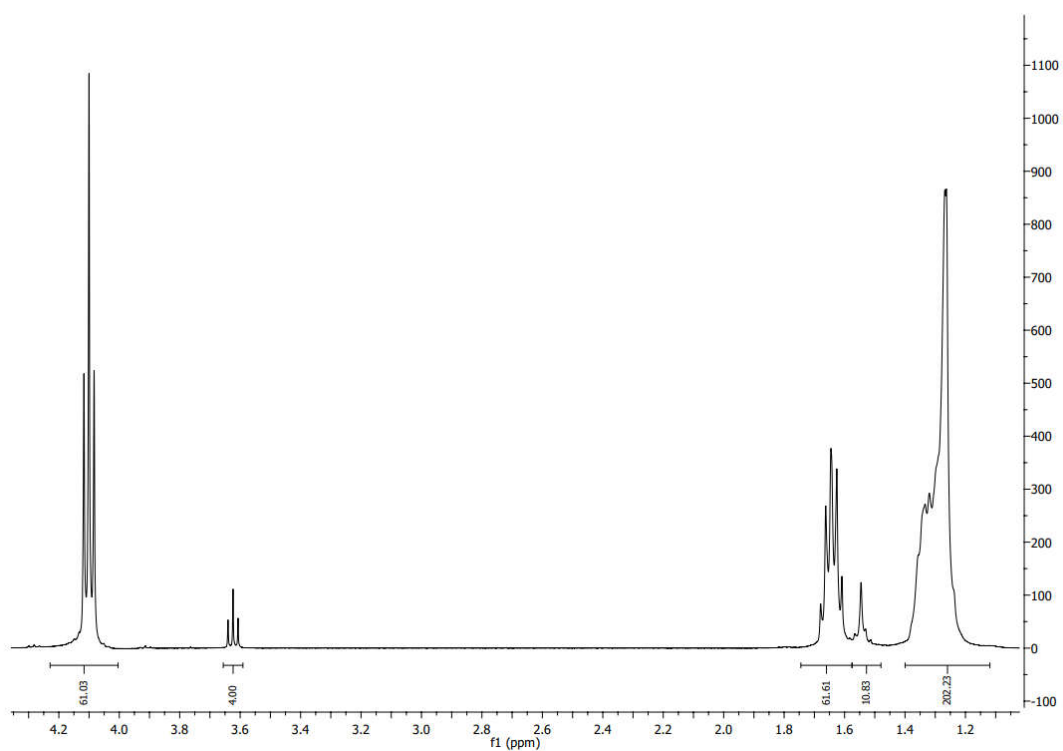

Figure S7  $^1\text{H}$  NMR spectrum of the E\_OCD\_3000.

### E\_OCD\_3000

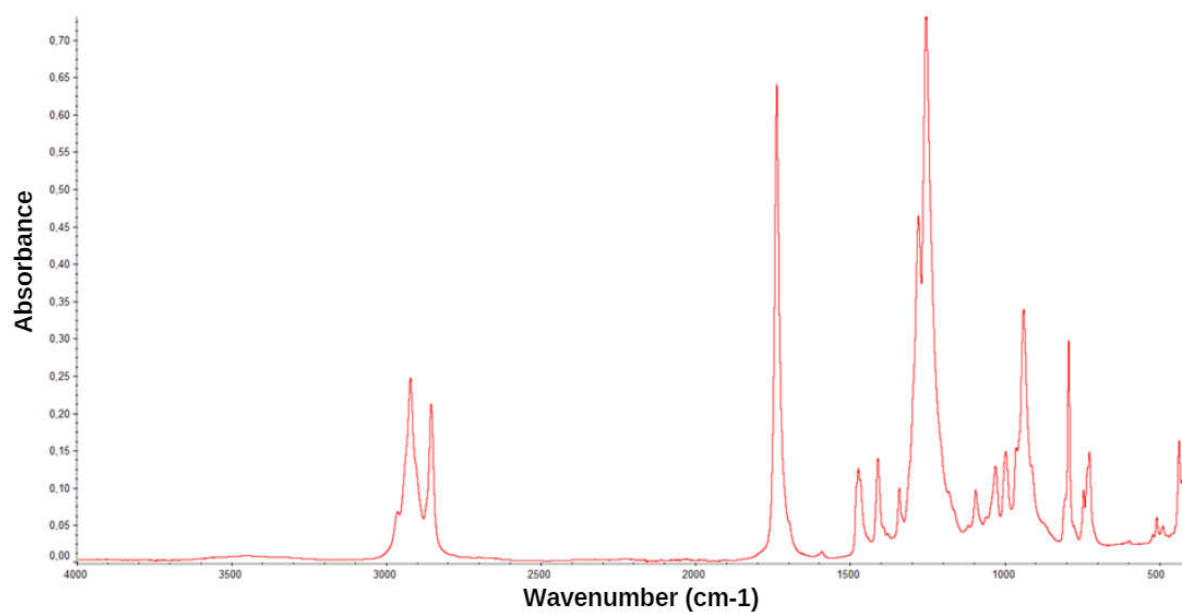

Figure S8 FTIR spectra of E\_OCD\_3000 oligocarbonate.

### E\_OCD\_5000

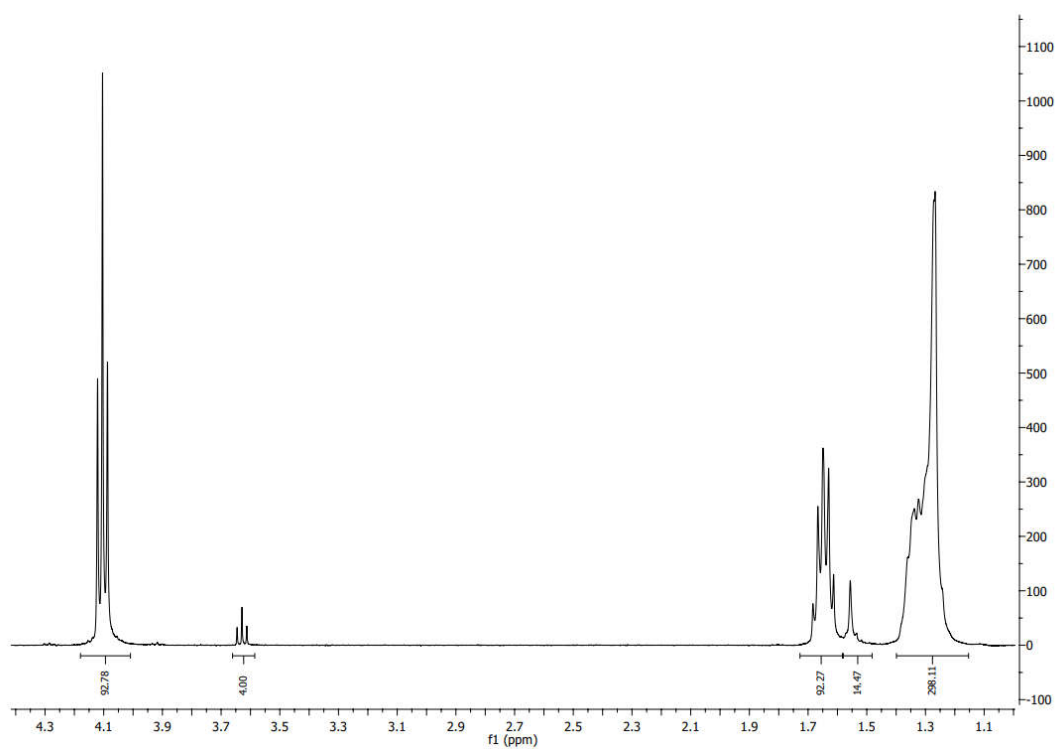

Figure S9  $^1\text{H}$  NMR spectrum of the E\_OCD\_5000.

## E\_OCD\_5000

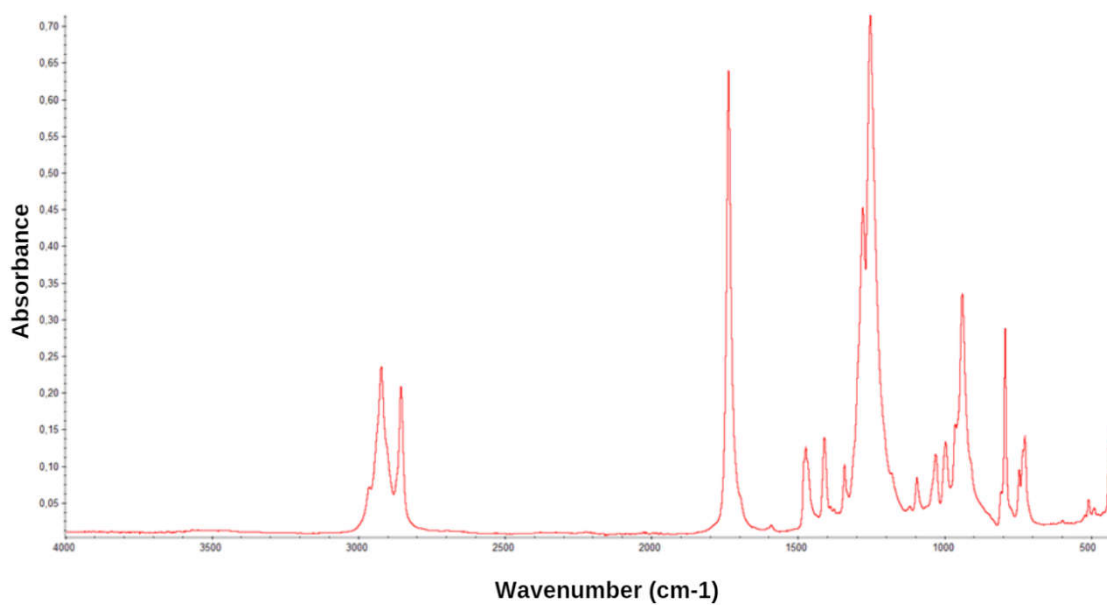

Figure S10 FTIR spectra of E\_OCD\_5000 oligocarbonate.

## E\_PCUU3000\_3.5 prepolymer

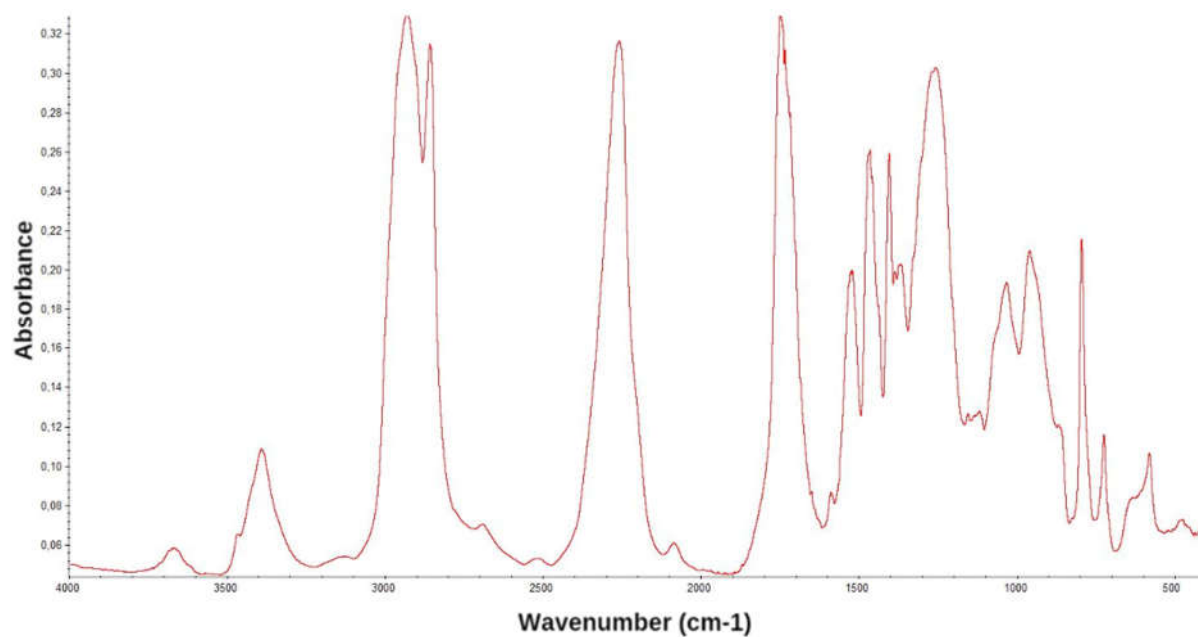

Figure S11 FTIR spectra of PCUU3000\_3.5 poly(carbonate-urea-urethane) prepolymer.

### **E\_PC UU3000\_3 prepolymer**

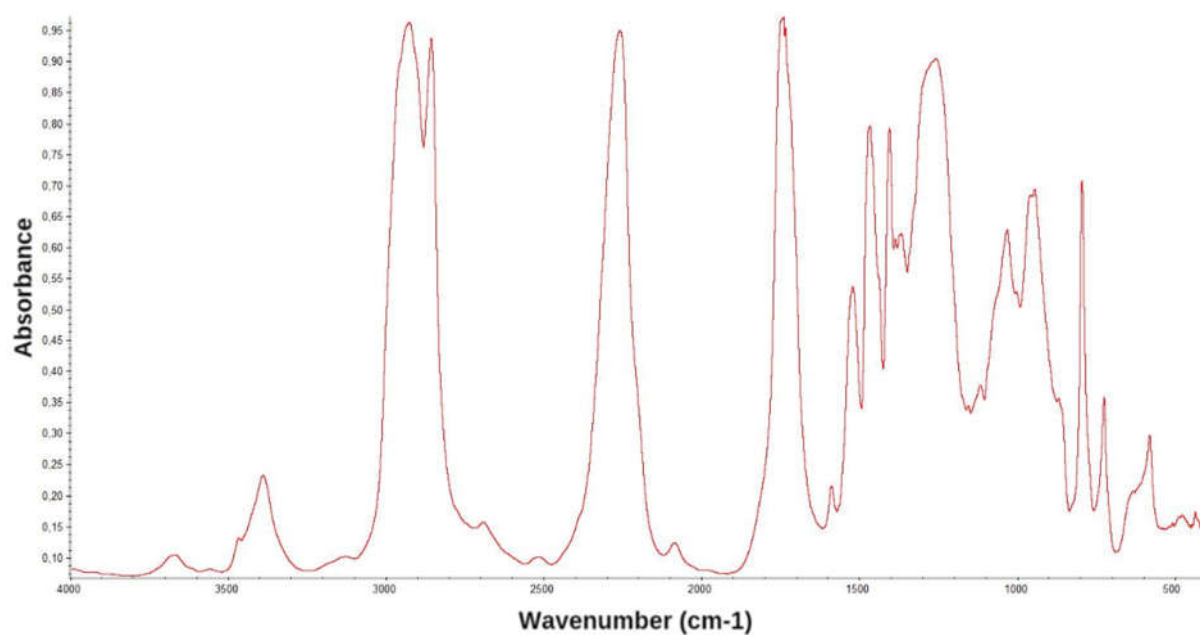

Figure 12 FTIR spectra of PCUU3000\_3 poly(carbonate-urea-urethane) prepolymer.

### **E\_PC UU3000\_2.5 prepolymer**

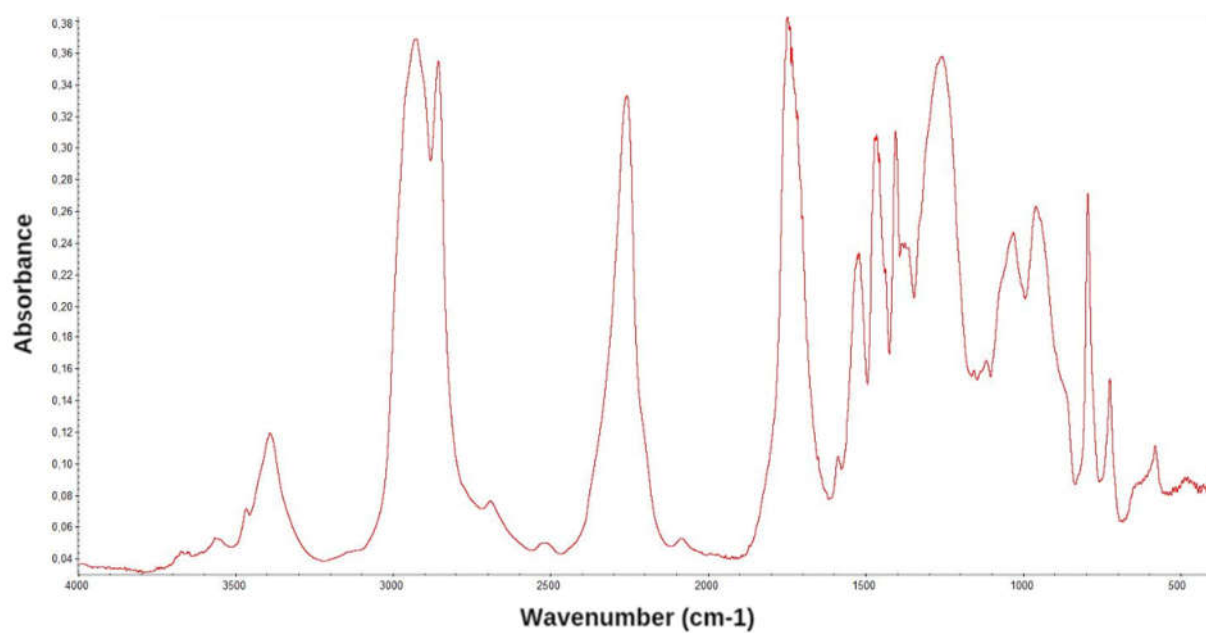

Figure S13 FTIR spectra of PCUU3000\_2.5 poly(carbonate-urea-urethane) prepolymer.

### **E\_PC UU3000\_2 prepolymer**

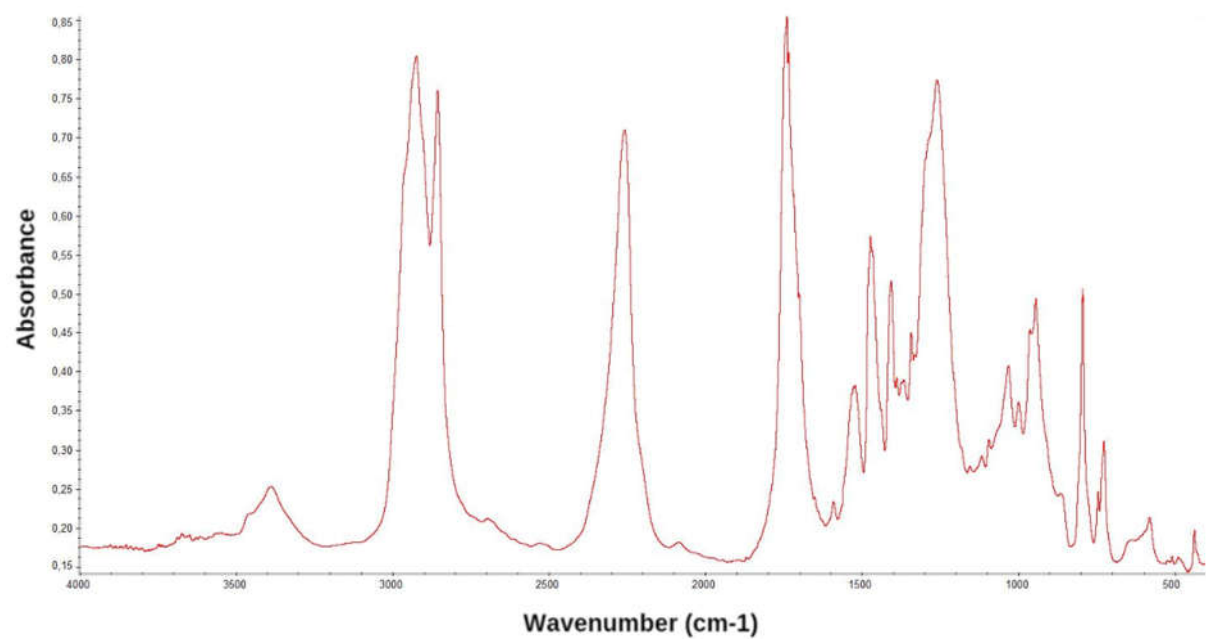

Figure S14 FTIR spectra of PCUU3000\_2 poly(carbonate-urea-urethane) prepolymer.

### **E\_PC UU3000\_1.5 prepolymer**

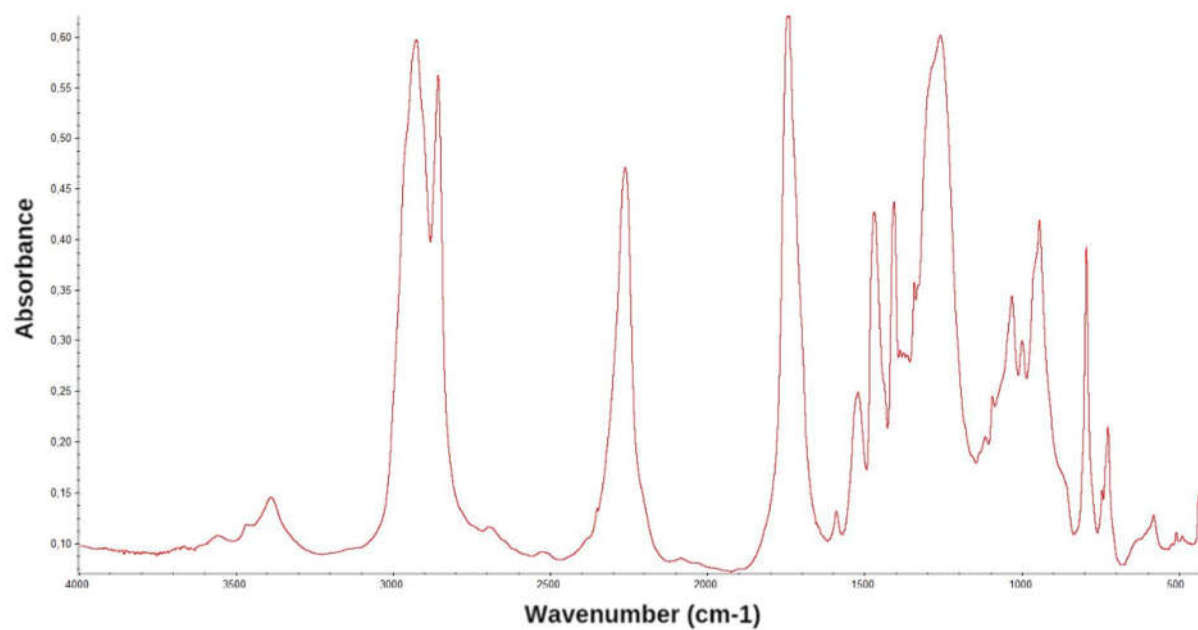

Figure S15 FTIR spectra of PCUU3000\_1.5 poly(carbonate-urea-urethane) prepolymer.

### **E\_PC UU5000\_3 prepolymer**

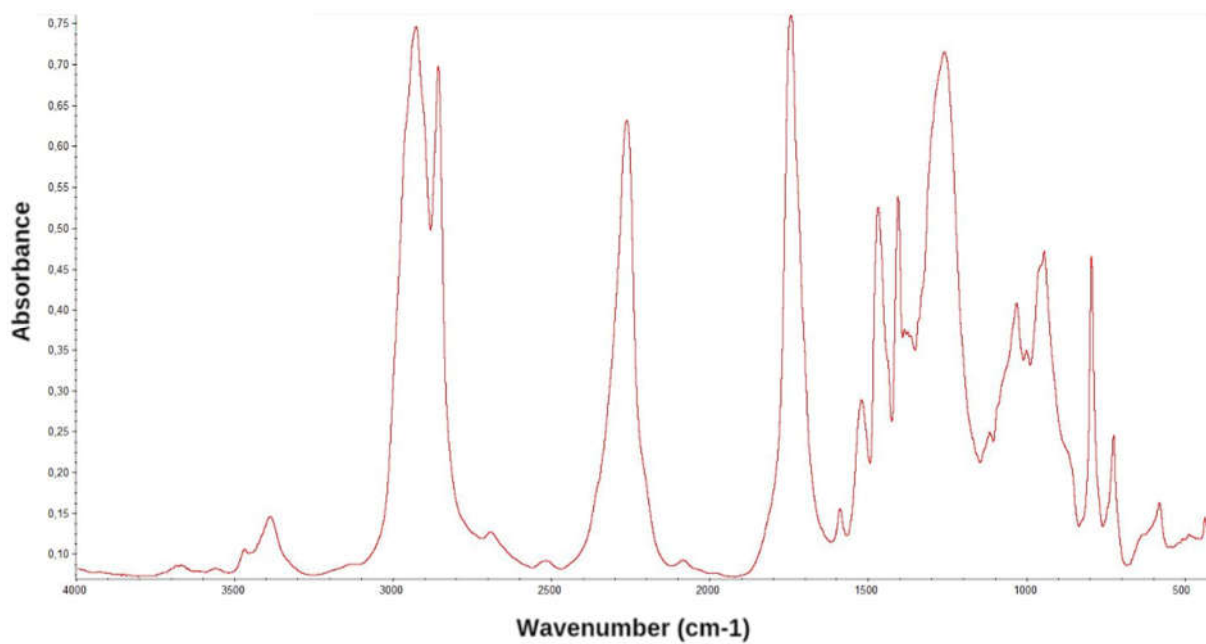

Figure S16 FTIR spectra of PCUU5000\_3 poly(carbonate-urea-urethane) prepolymer.

### **E\_PC UU5000\_2 prepolymer**

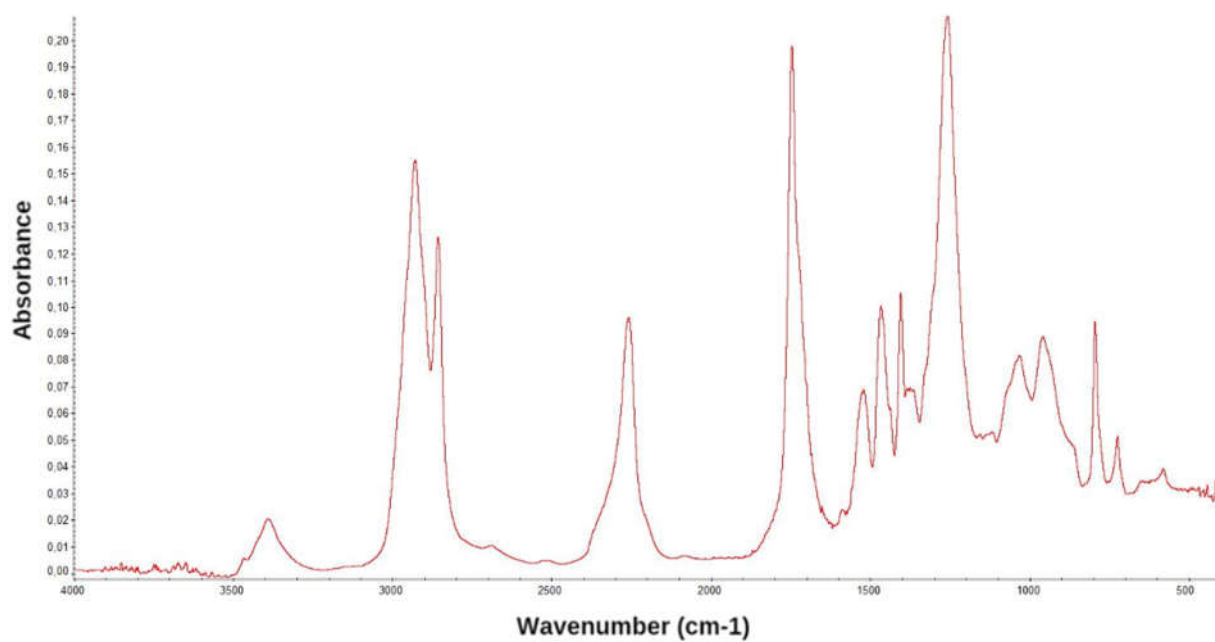

Figure S17 FTIR spectra of PCUU5000\_2 poly(carbonate-urea-urethane) prepolymer.

### E\_PCUU3000\_3

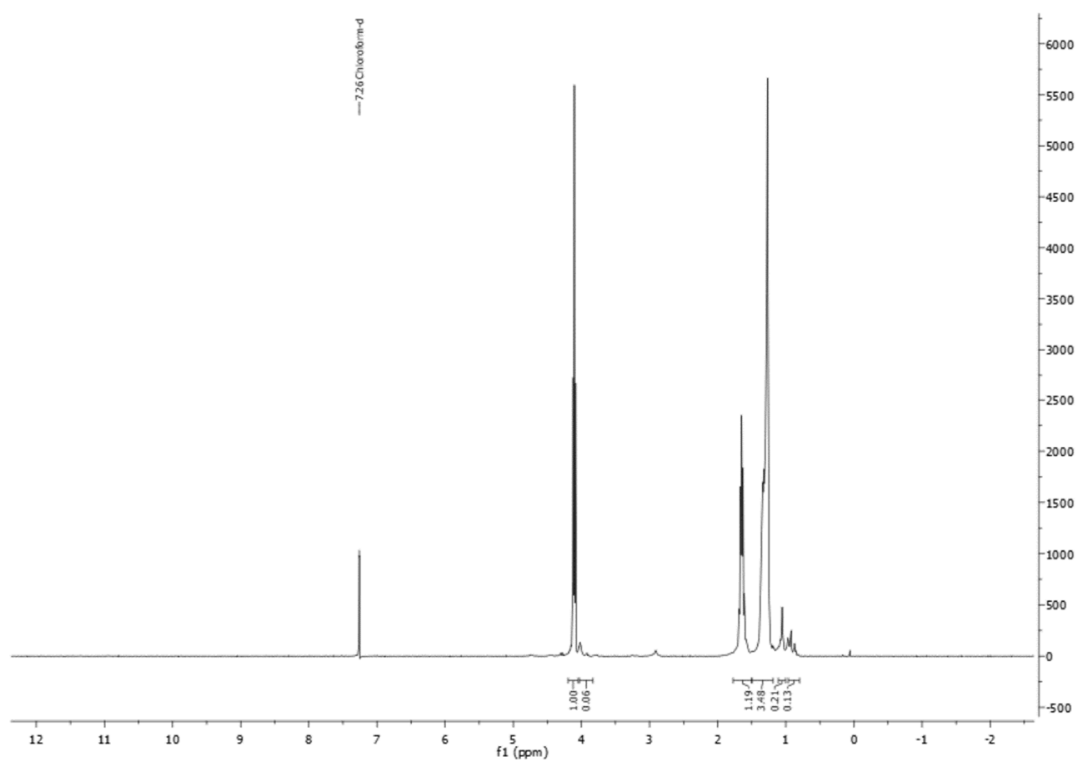

Figure S18  $^1\text{H}$  NMR spectrum of the E\_PCUU3000\_3.

### E\_PCUU3000\_2.5

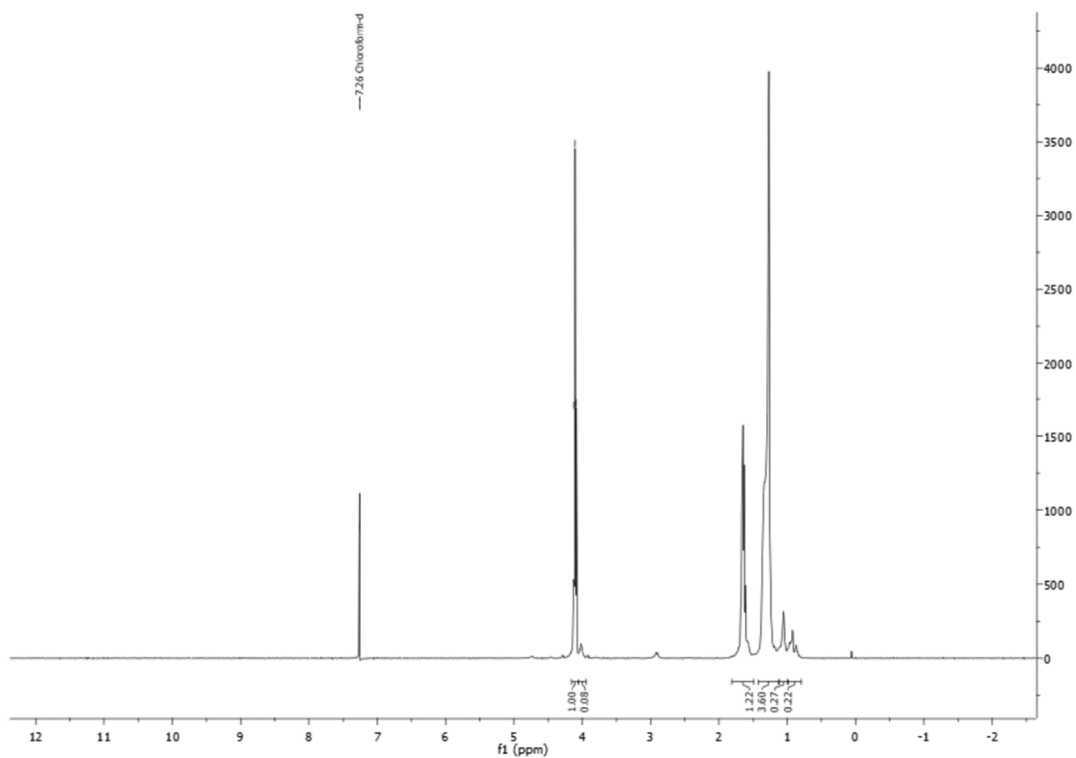

Figure S19  $^1\text{H}$  NMR spectrum of the E\_PCUU3000\_2.5.

## E\_PCUU3000\_2

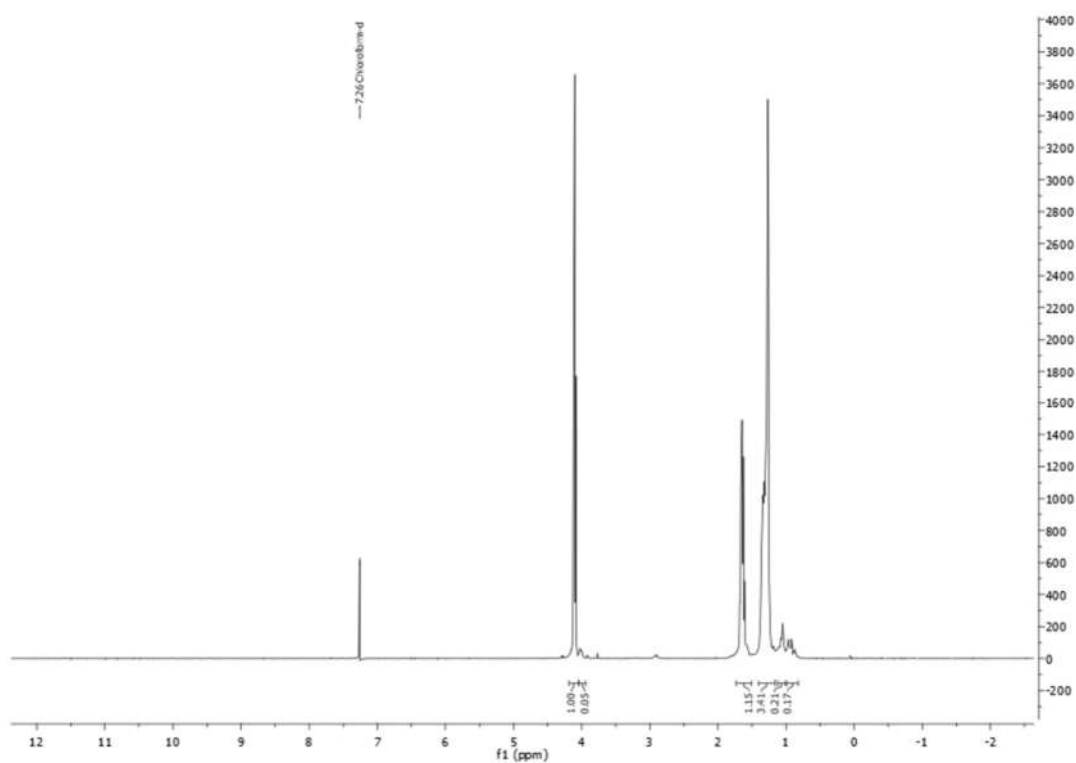

Figure S20  $^1\text{H}$  NMR spectrum of the E\_PCUU3000\_2.

## E\_PCUU3000\_1.5

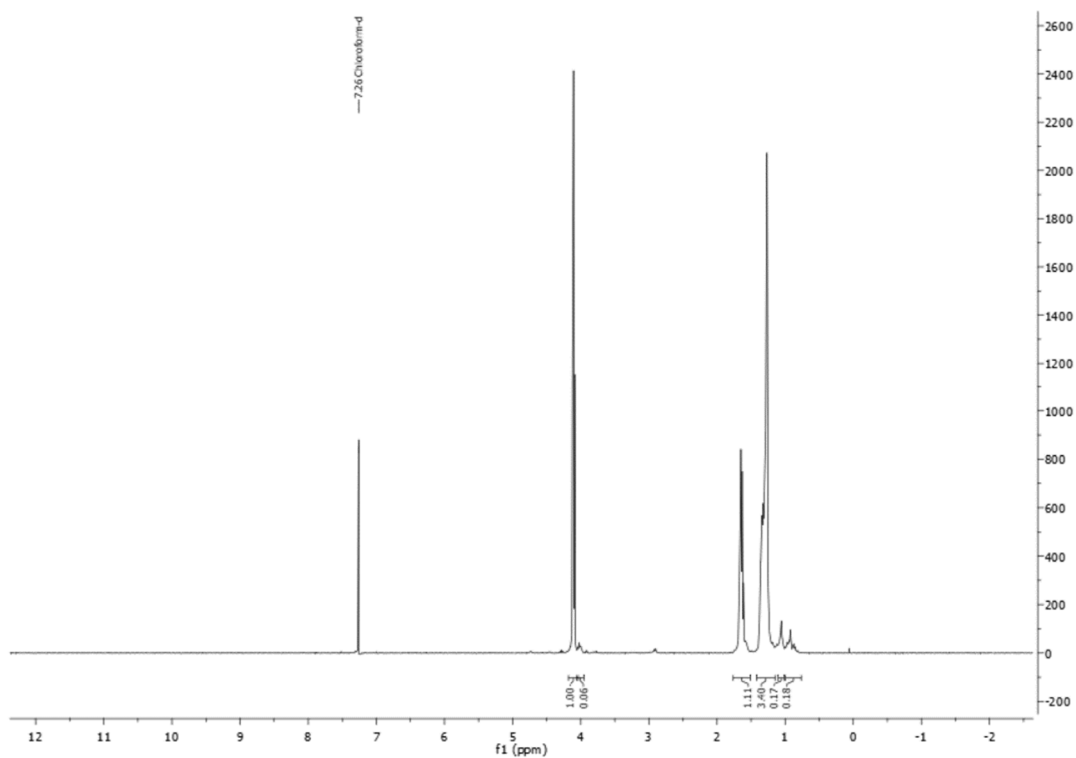

Figure S21  $^1\text{H}$  NMR spectrum of the E\_PCUU3000\_1.5.

### E\_PCUU3000\_3.5

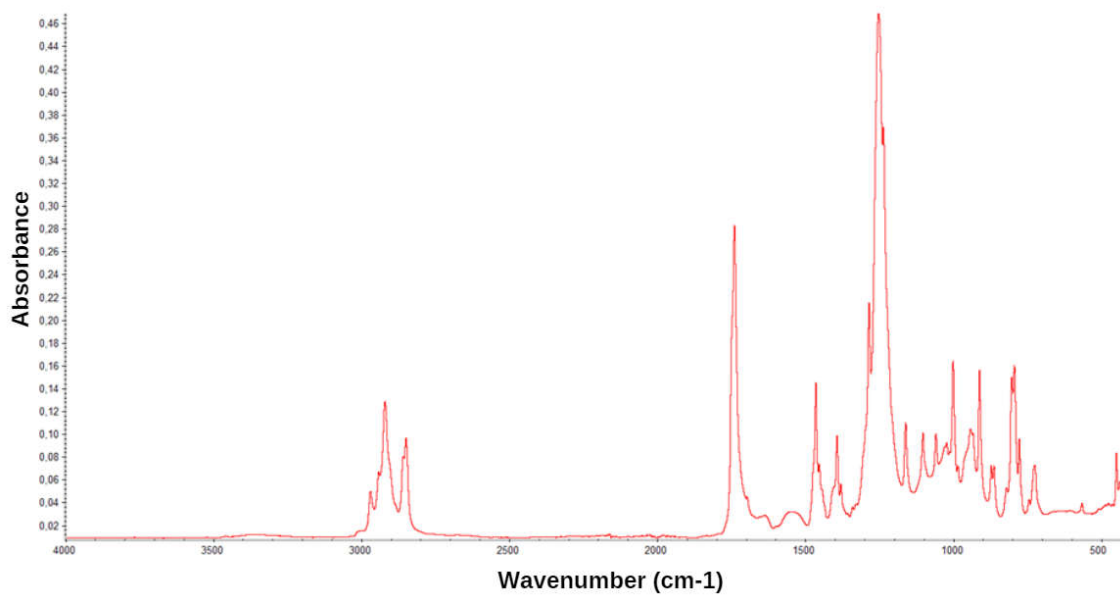

Figure S22 FTIR (ATR) spectra of PCUU3000\_3.5 poly(carbonate-urea-urethane).

### E\_PCUU3000\_3

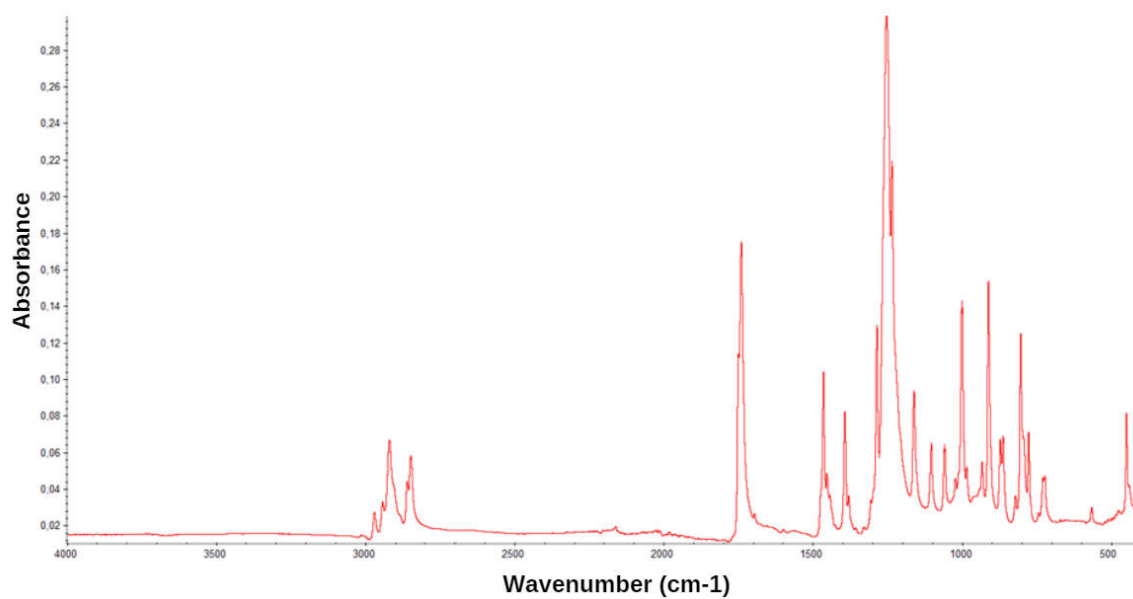

Figure S23 FTIR (ATR) spectra of PCUU3000\_3 poly(carbonate-urea-urethane).

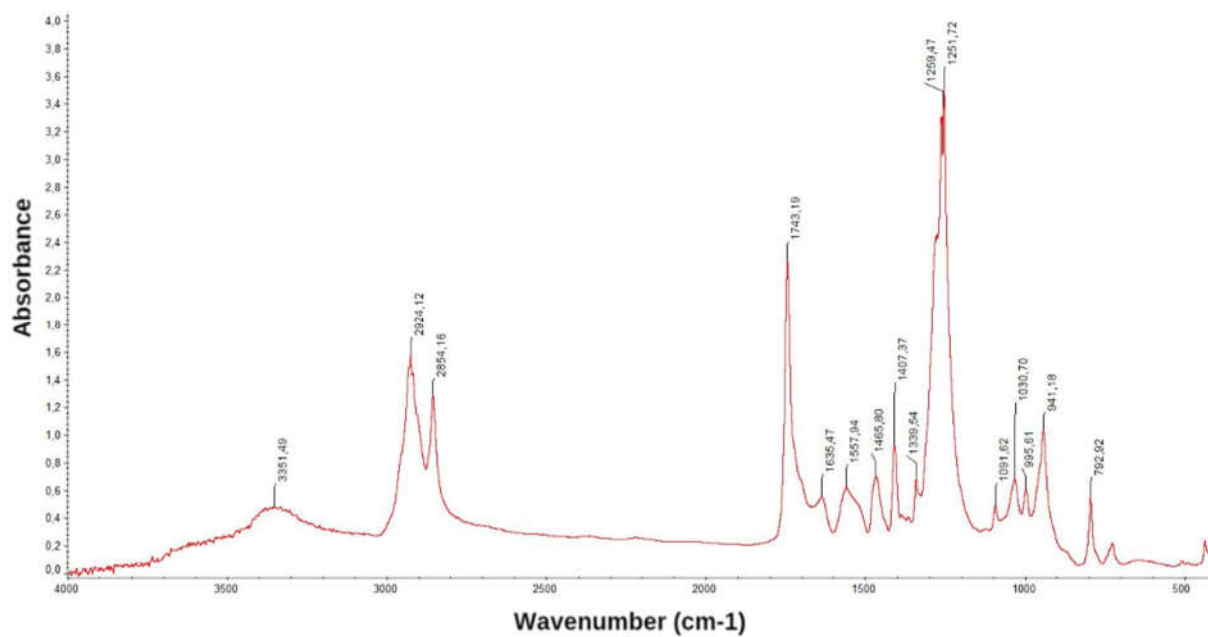

Figure S24 FTIR transmittance spectra of PCUU3000\_3 poly(carbonate-urea-urethane).

**E\_PC UU3000\_2.5**

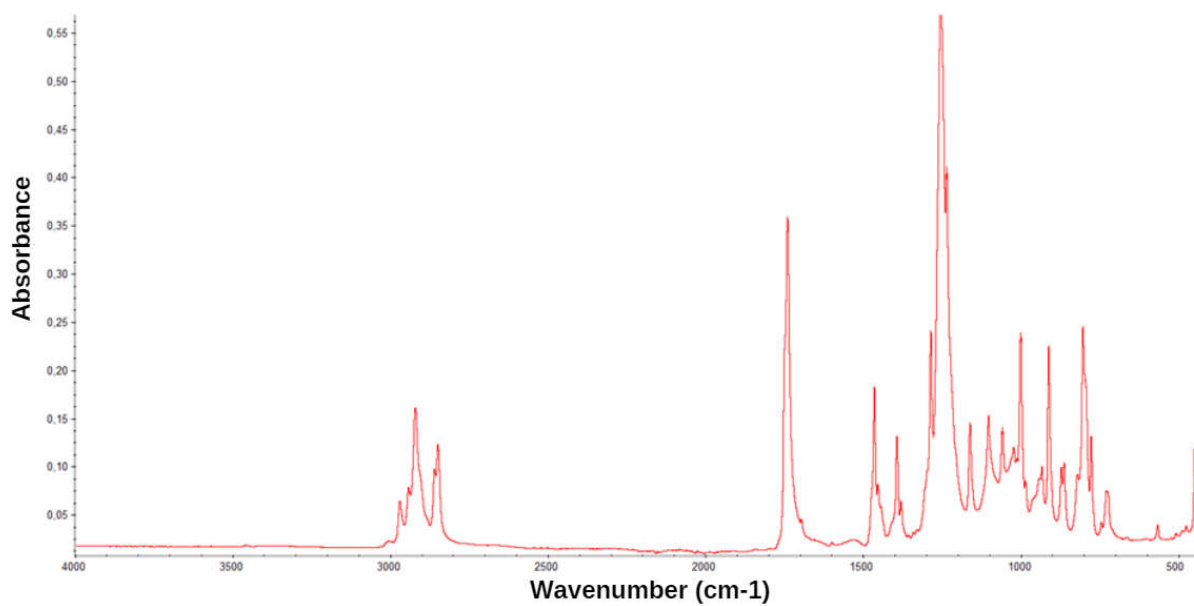

Figure S25 FTIR (ATR) spectra of PCUU3000\_2.5 poly(carbonate-urea-urethane).

### **E\_PC UU3000\_2**

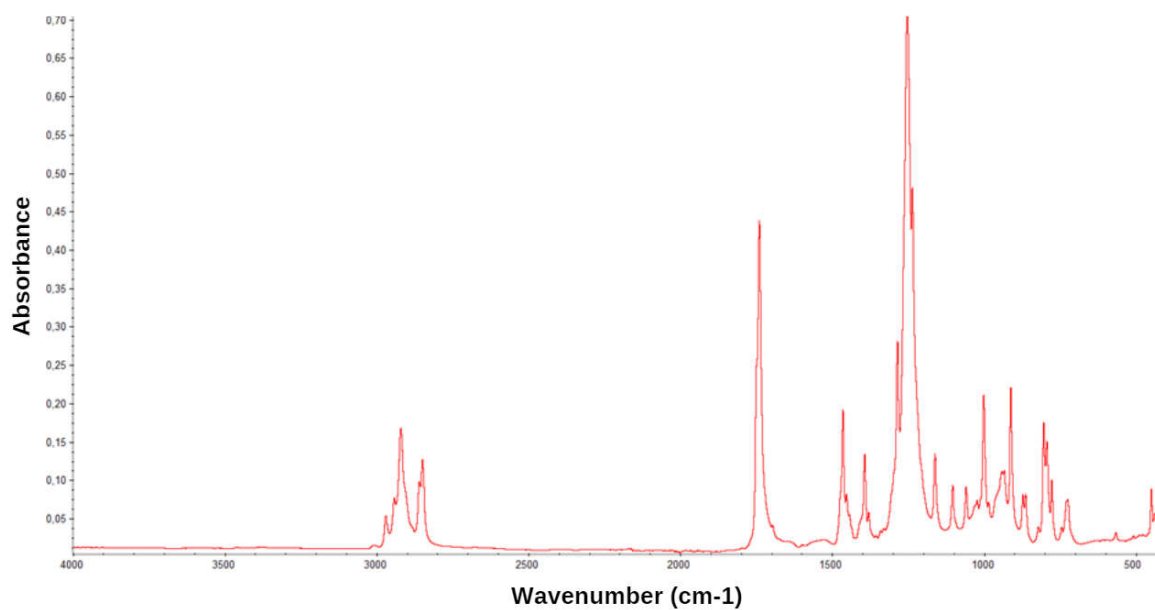

Figure S26 FTIR (ATR) spectra of PCUU3000\_2 poly(carbonate-urea-urethane).

### **E\_PC UU3000\_1.5**

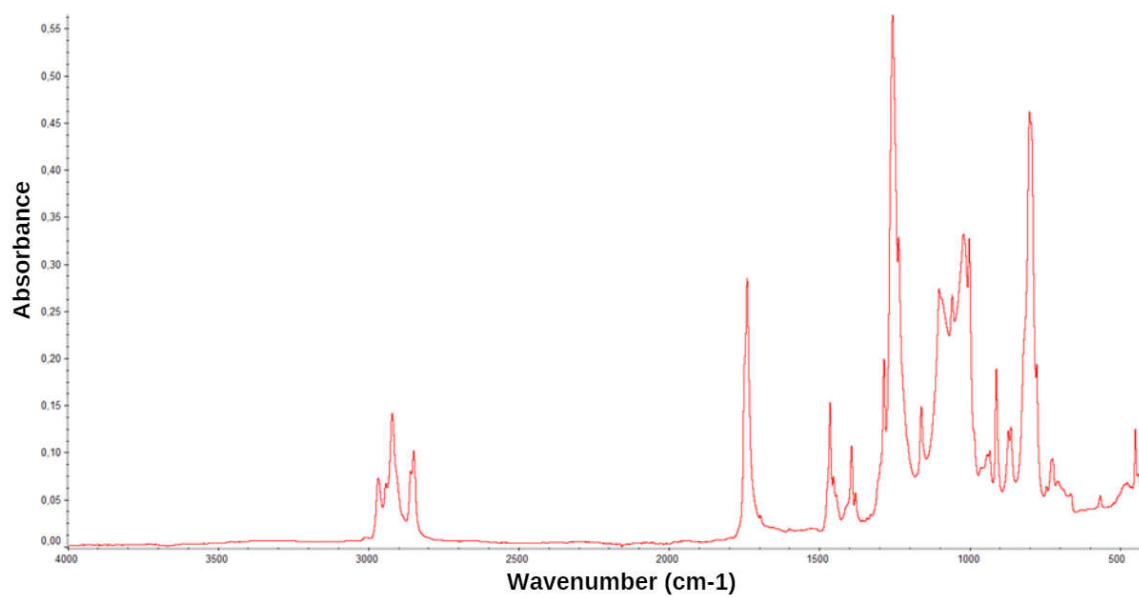

Figure S27 FTIR (ATR) spectra of PCUU3000\_1.5 poly(carbonate-urea-urethane).

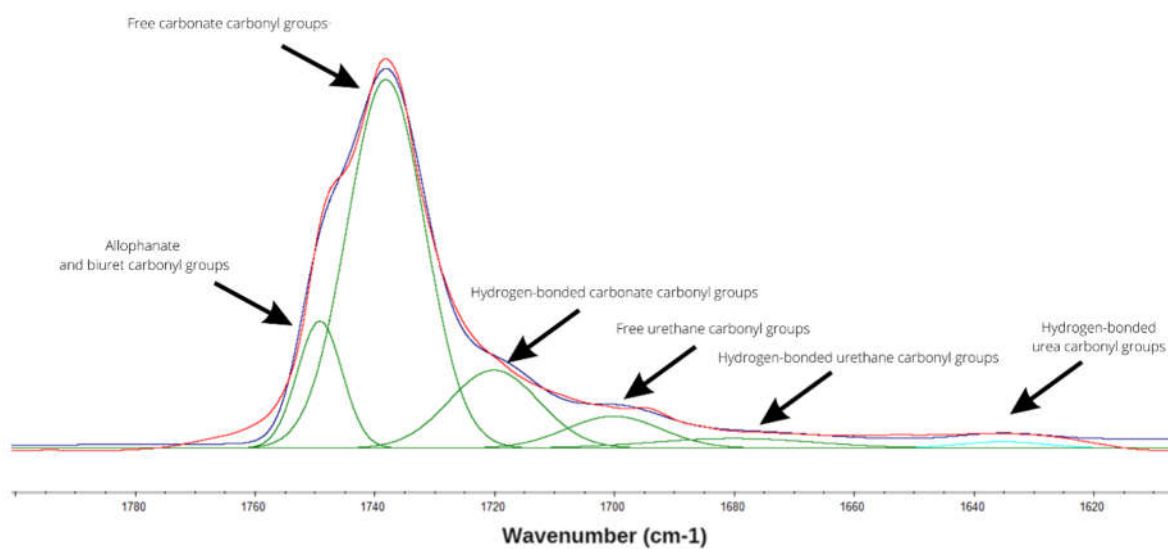

Figure S28 FTIR (ATR) Multiple absorption band distribution of E\_PC UU3000\_3.5.

## MALDI-TOF results

### E\_OCD\_3000

Table S1 MALDI-TOF results of the E\_OCD\_3000.

| Pn   | Pw   | Pz   | PD  | DPn  | DPw  | DPz  |
|------|------|------|-----|------|------|------|
| 2909 | 3973 | 4660 | 1,4 | 13,9 | 19,2 | 22,6 |

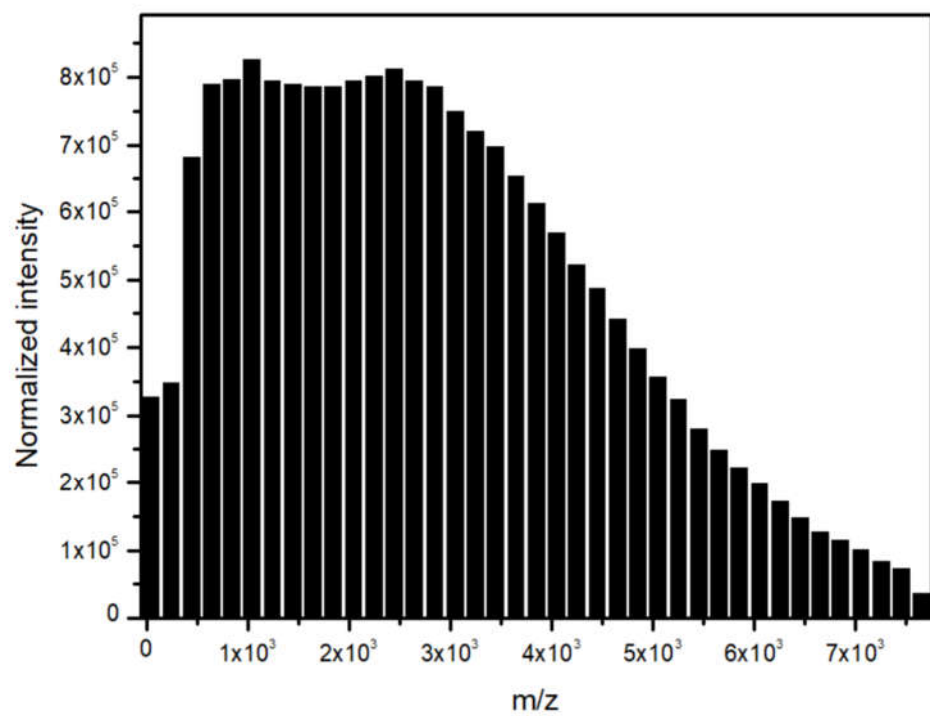

Figure S29 MALDI-TOF normalized intensity results of the E\_OCD\_3000.

**Shape memory properties**

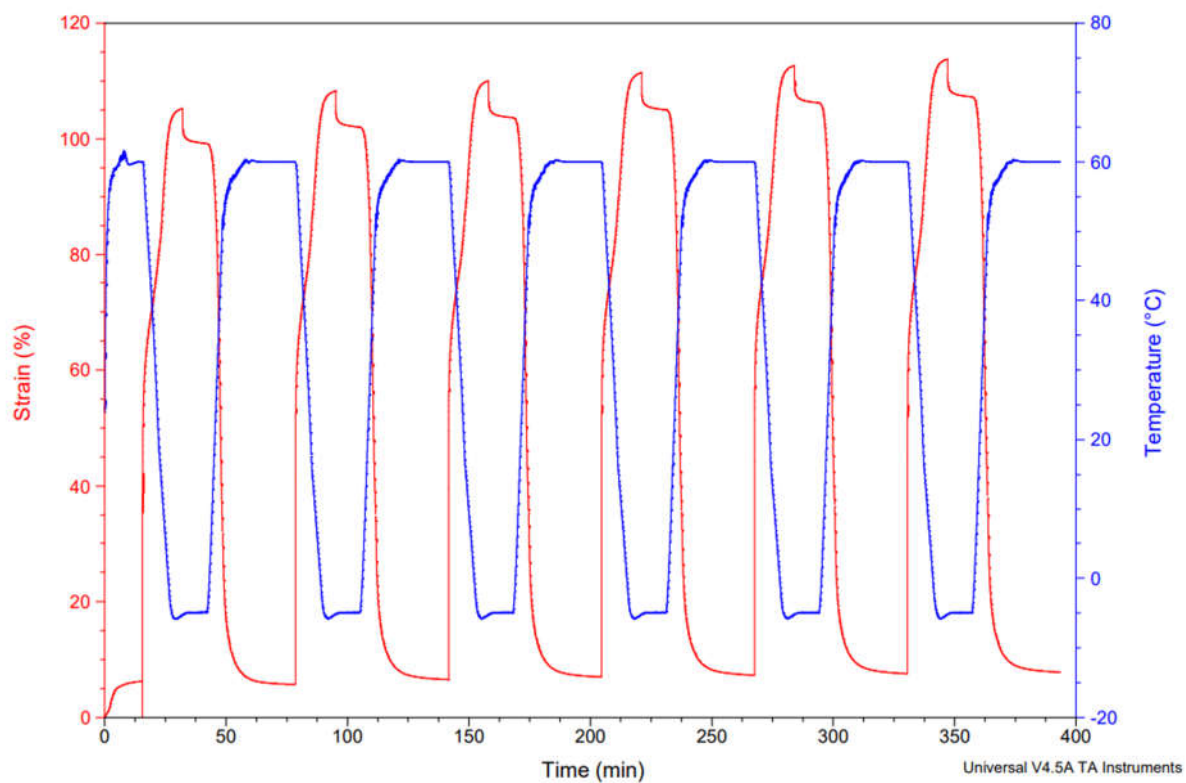

Figure S30 Thermomechanical SME measurement during 5 cycles for PCUU3000\_3.5 poly(carbonate-urea-urethane)s (5N).

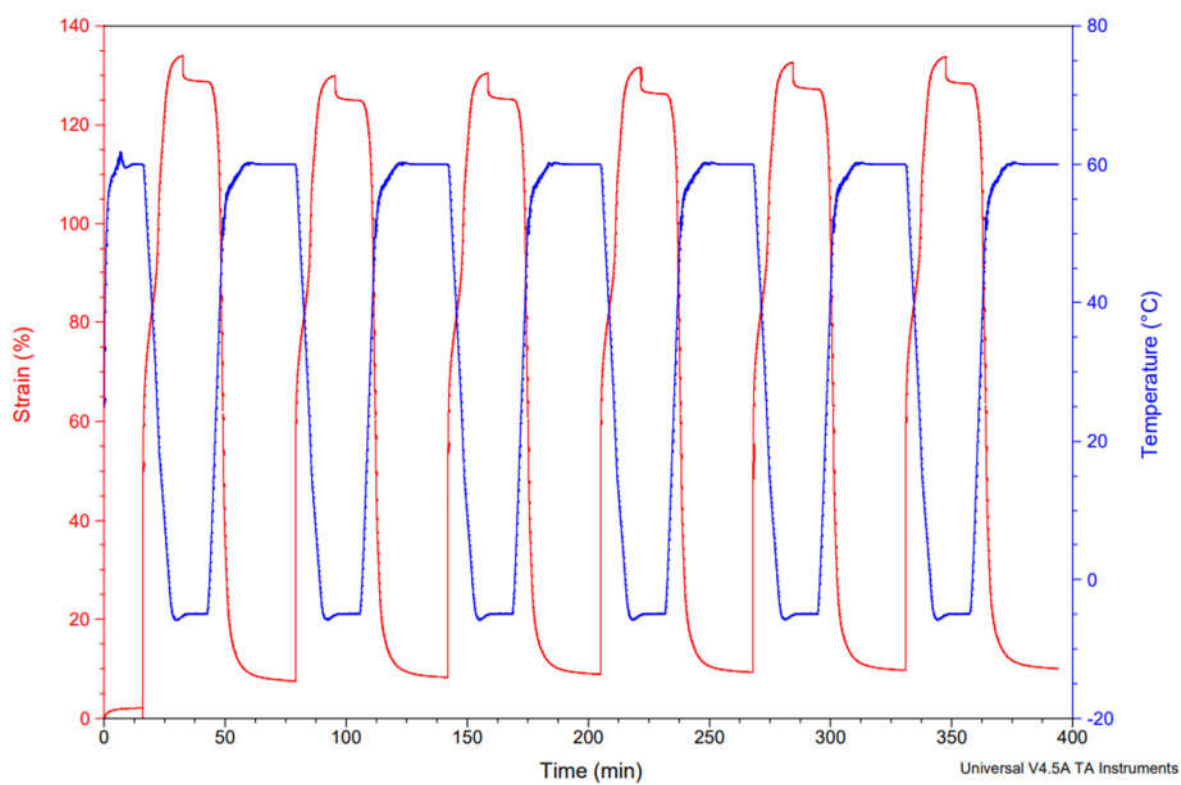

Figure S31 Thermomechanical SME measurement during 5 cycles for PCUU3000\_3 poly(carbonate-urea-urethane)s (5N).

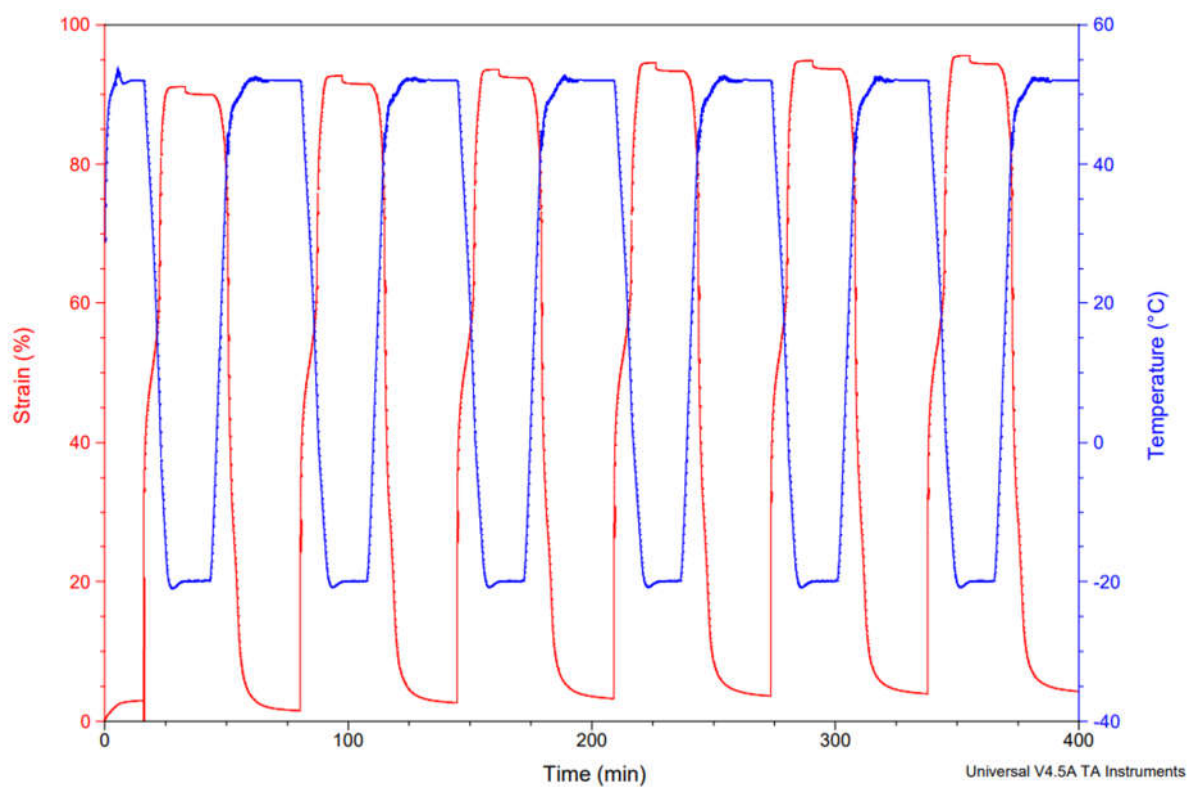

Figure S32 Thermomechanical SME measurement during 5 cycles for PCUU3000\_2.5 poly(carbonate-urethane)s (2N).

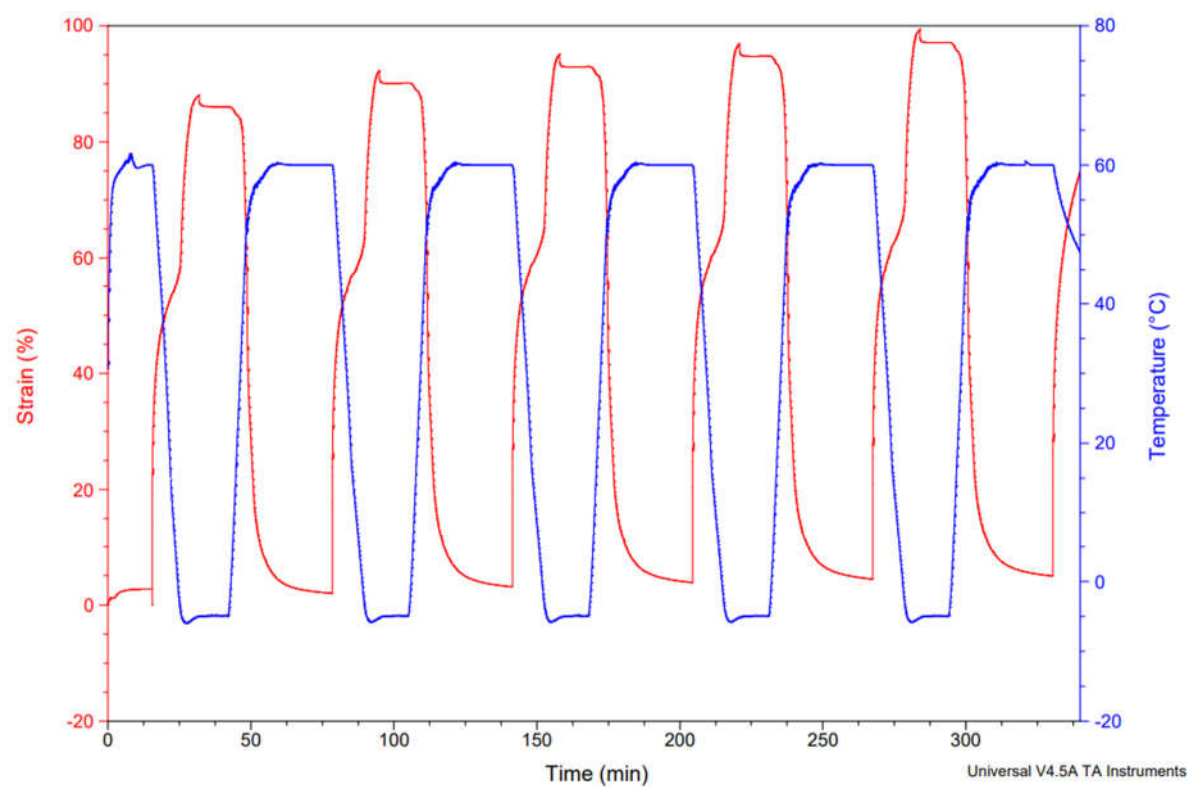

Figure S33 Thermomechanical SME measurement during 5 cycles for PCUU3000\_2 poly(carbonate-urethane)s (1N).

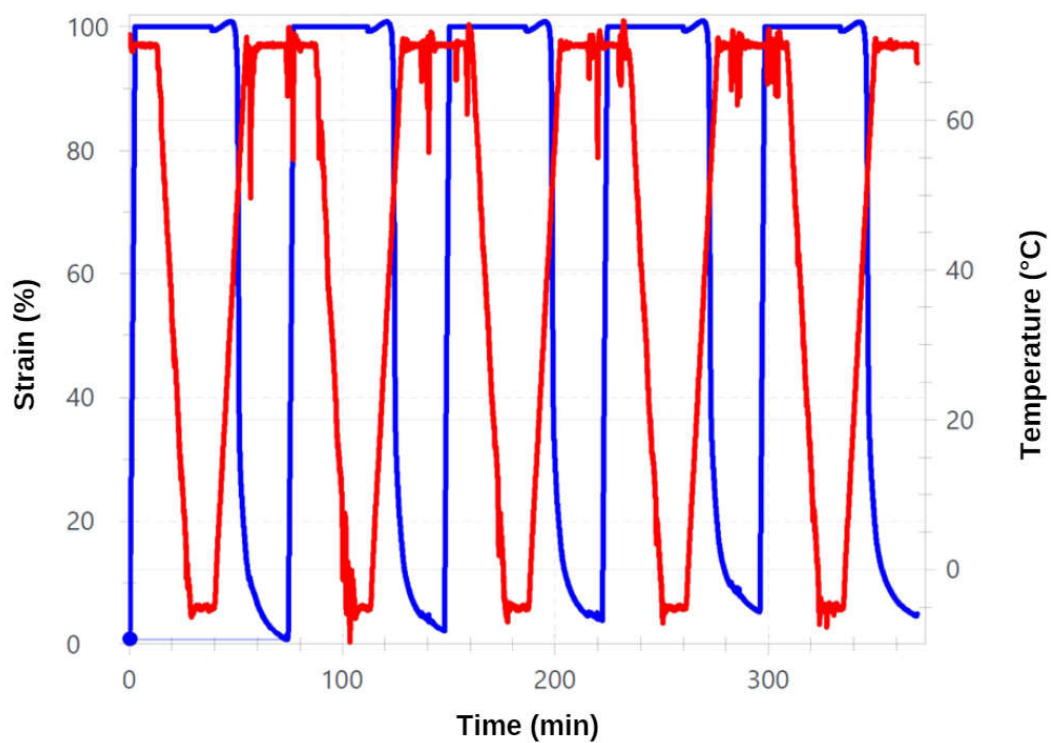

Figure S34 Thermomechanical SME measurement during 5 cycles for PCUU5000\_3 poly(carbonate-urea-urethane)s (1N).

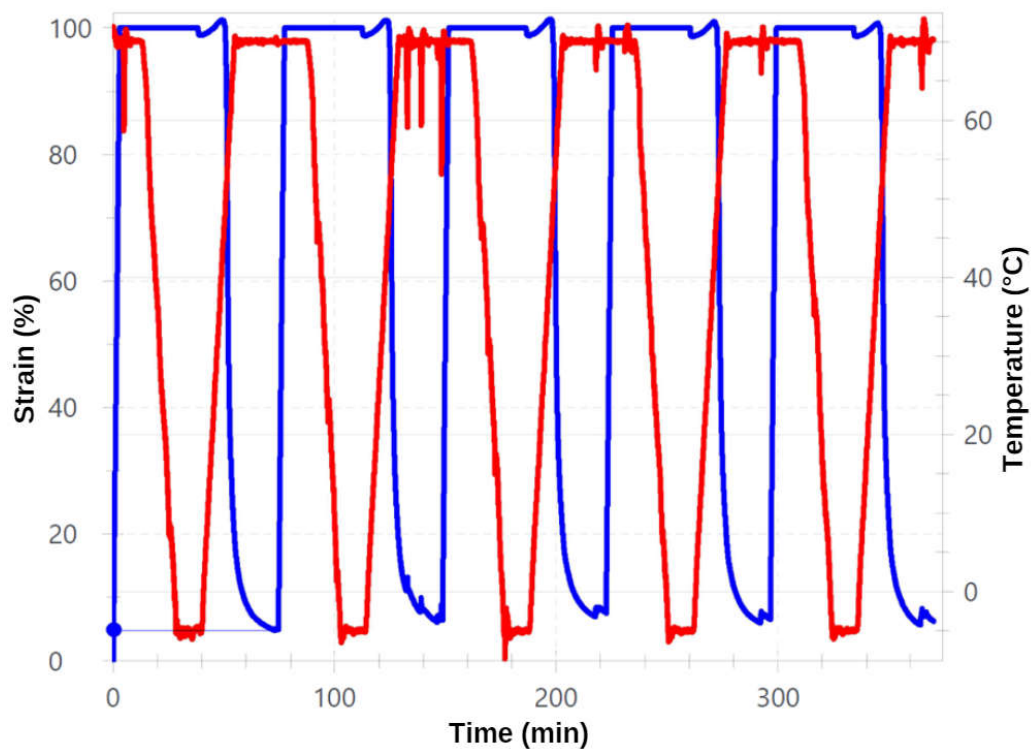

Figure S35 Thermomechanical SME measurement during 5 cycles for PCUU5000\_2 poly(carbonate-urea-urethane)s (1N).

### Tensile tests

### E\_PC UU3000\_3.5

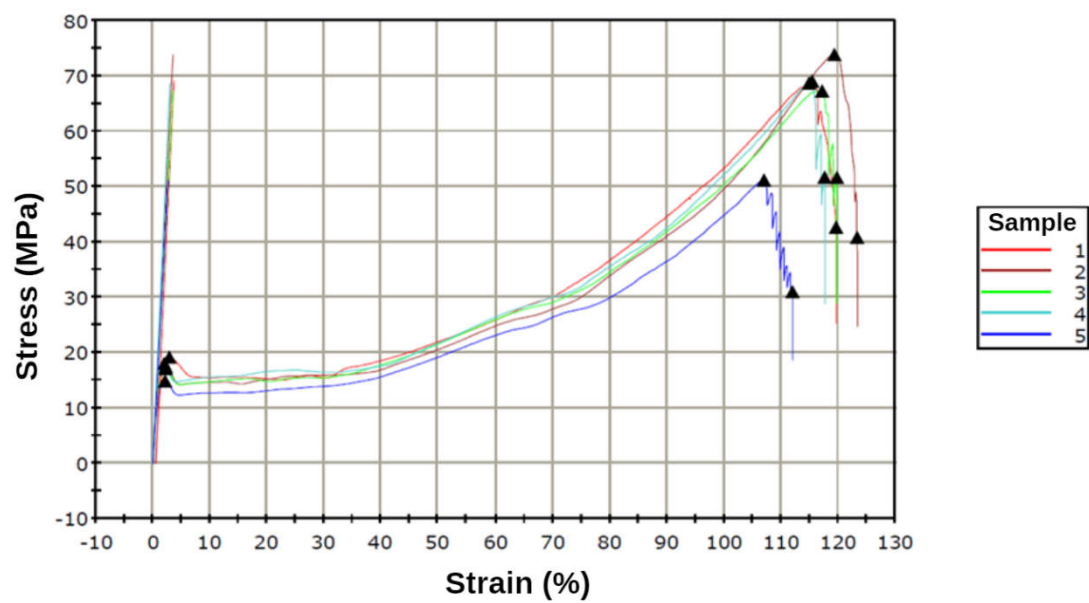

Figure S36 Stress-strain curves for E\_PCUU3000\_3.5 poly(carbonate-urea-urethane)s.

### E\_PCUU3000\_3

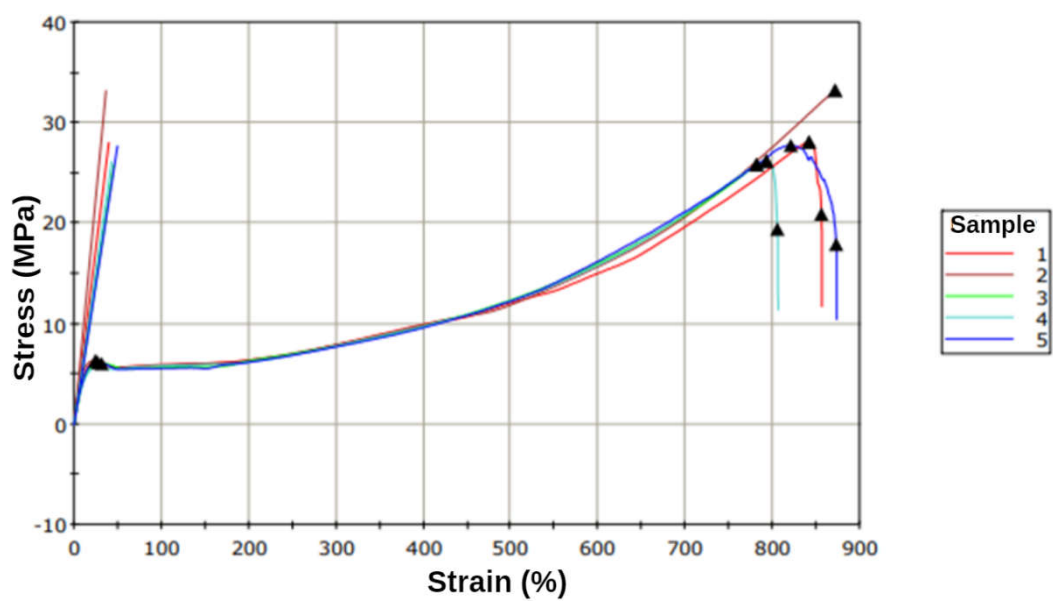

Figure S37 Stress-strain curves for E\_PCUU3000\_3 poly(carbonate-urea-urethane)s.

### E\_PCUU3000\_2.5

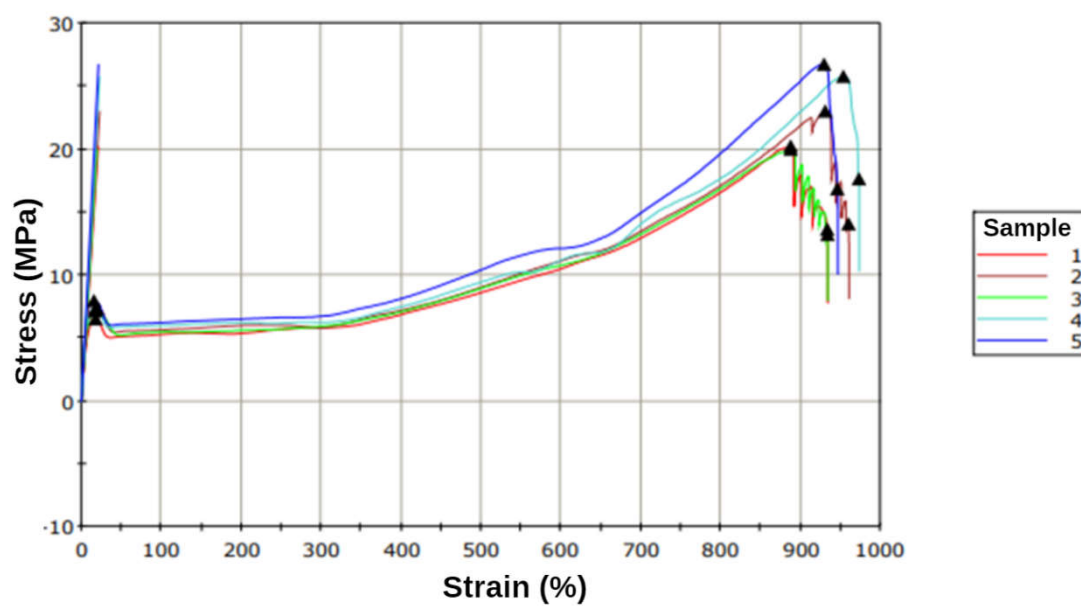

Figure S38 Stress-strain curves for E\_PCUU3000\_2.5 poly(carbonate-urea-urethane)s.

## E\_PCUU3000\_2

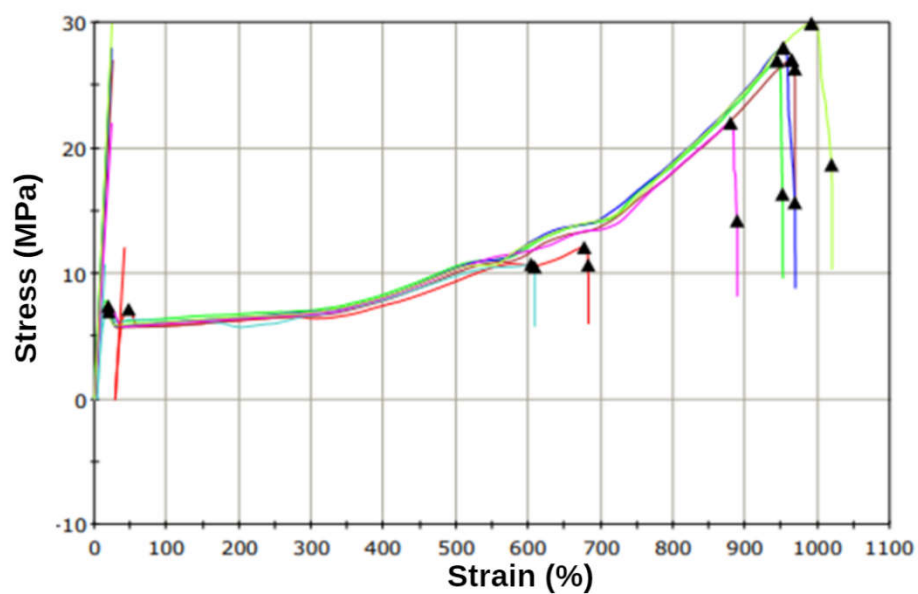

Figure S39 Stress-strain curves for E\_PCUU3000\_2 poly(carbonate-urea-urethane)s.

## E\_PCUU3000\_1.5

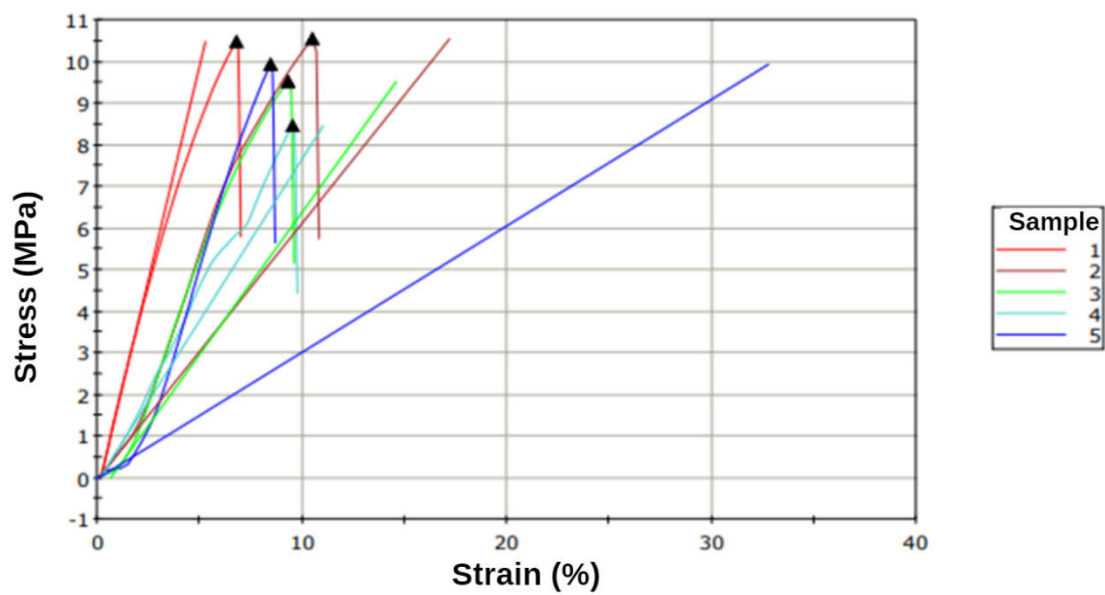

Figure S40 Stress-strain curves for E\_PCUU3000\_1.5 poly(carbonate-urea-urethane)s.

### E\_PCUU5000\_3

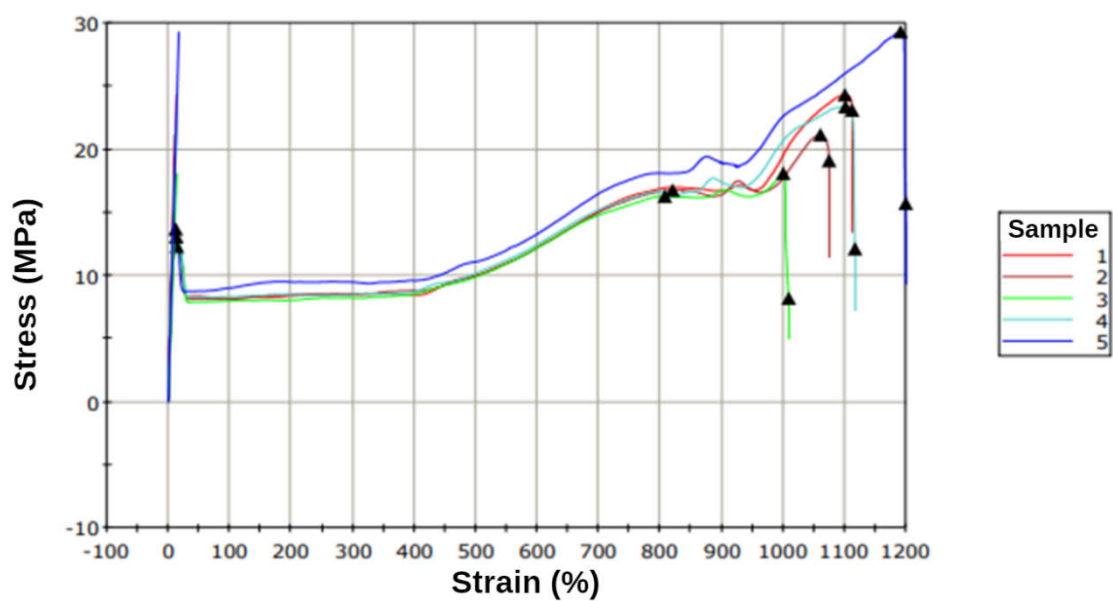

Figure S41 Stress-strain curves for E\_PCUU5000\_3 poly(carbonate-urea-urethane)s.

### E\_PCUU5000\_2

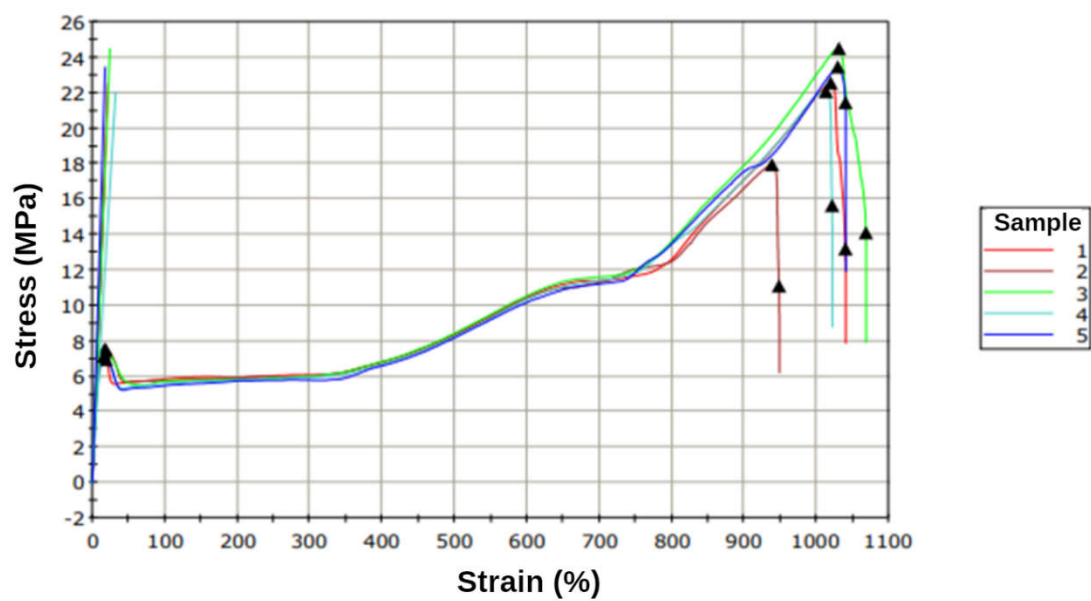

Figure S42 Stress-strain curves for E\_PCUU5000\_2 poly(carbonate-urea-urethane)s.

## Thermal analysis

### Differential scanning calorimetry (DSC)

#### E\_PCUU3000\_3.5

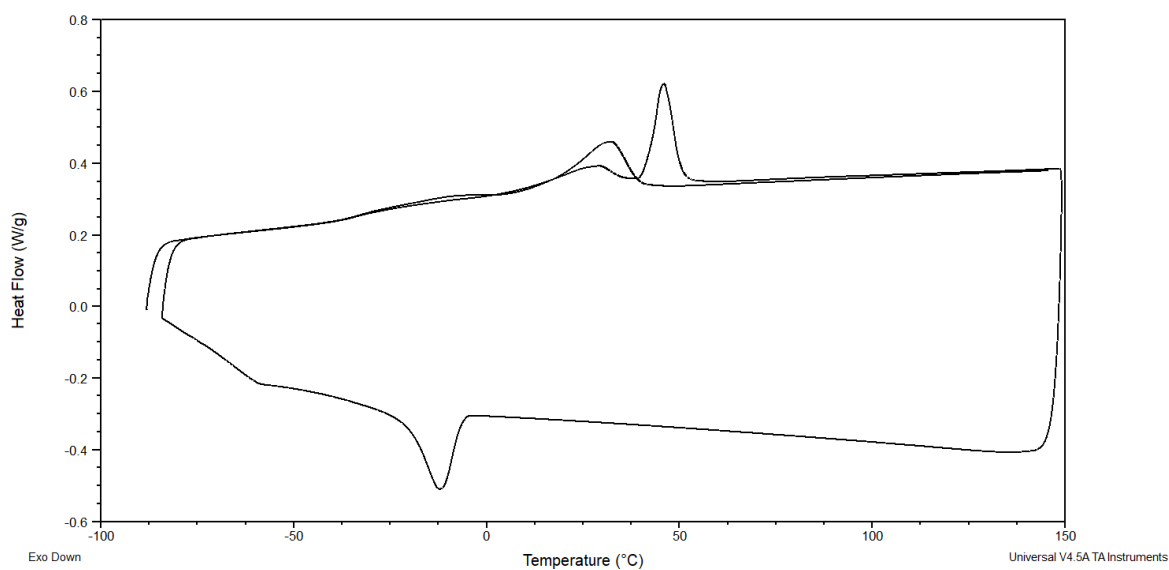

Figure S43 Heat Flow-Temperature curves for E\_PCUU3000\_3.5 poly(carbonate-urea-urethane).

#### E\_PCUU3000\_3

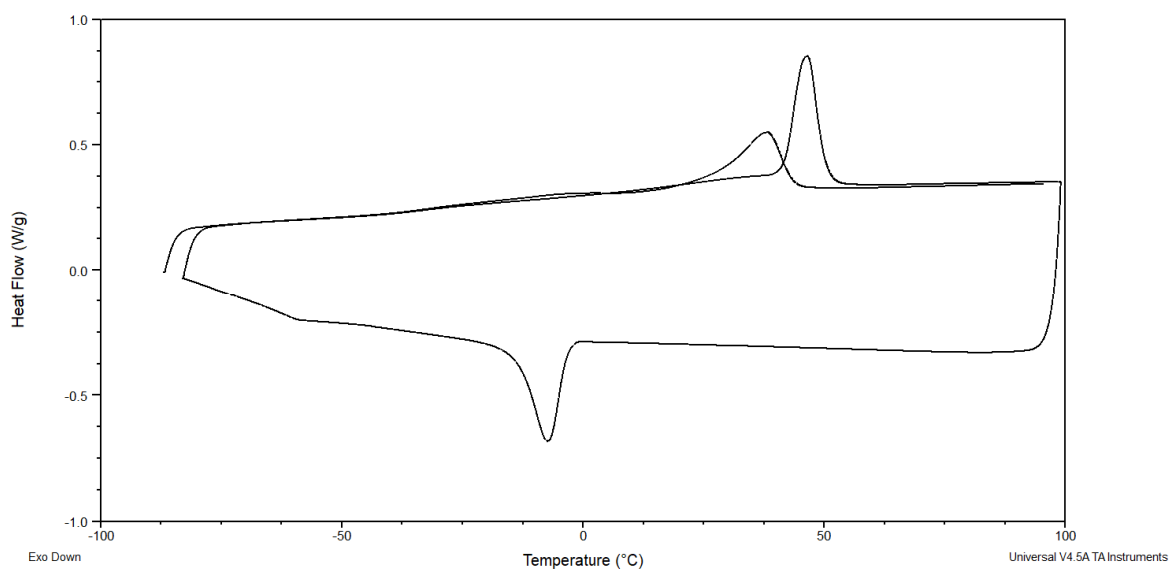

Figure S44 Heat Flow-Temperature curves for E\_PCUU3000\_3 poly(carbonate-urea-urethane).

### E\_PCUU3000\_2.5

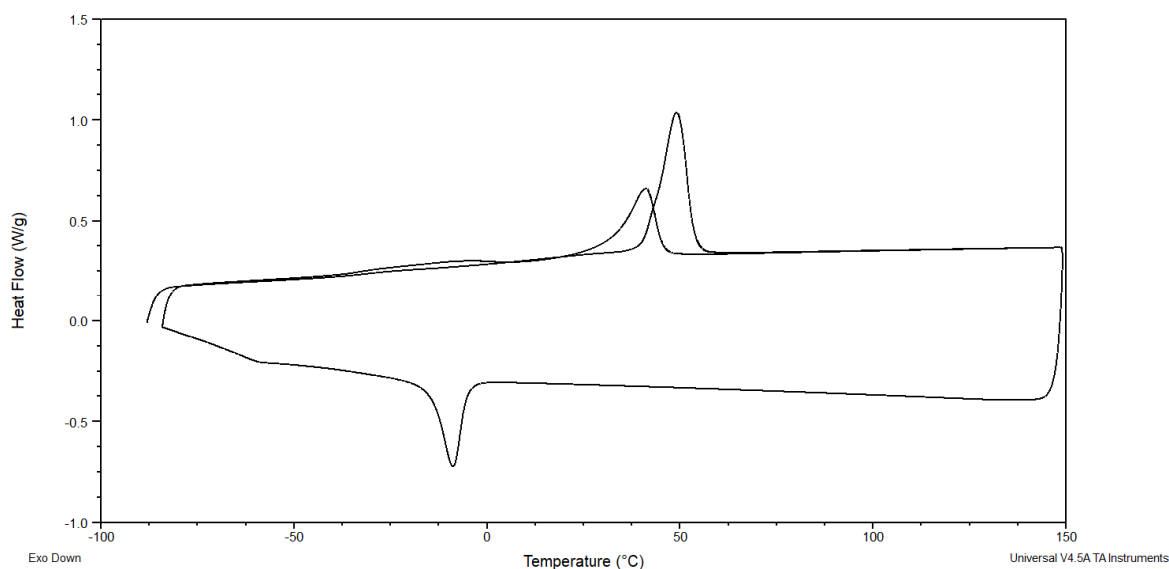

Figure S45 Heat Flow-Temperature curves for E\_PCUU3000\_2.5 poly(carbonate-urea-urethane).

### E\_PCUU3000\_2

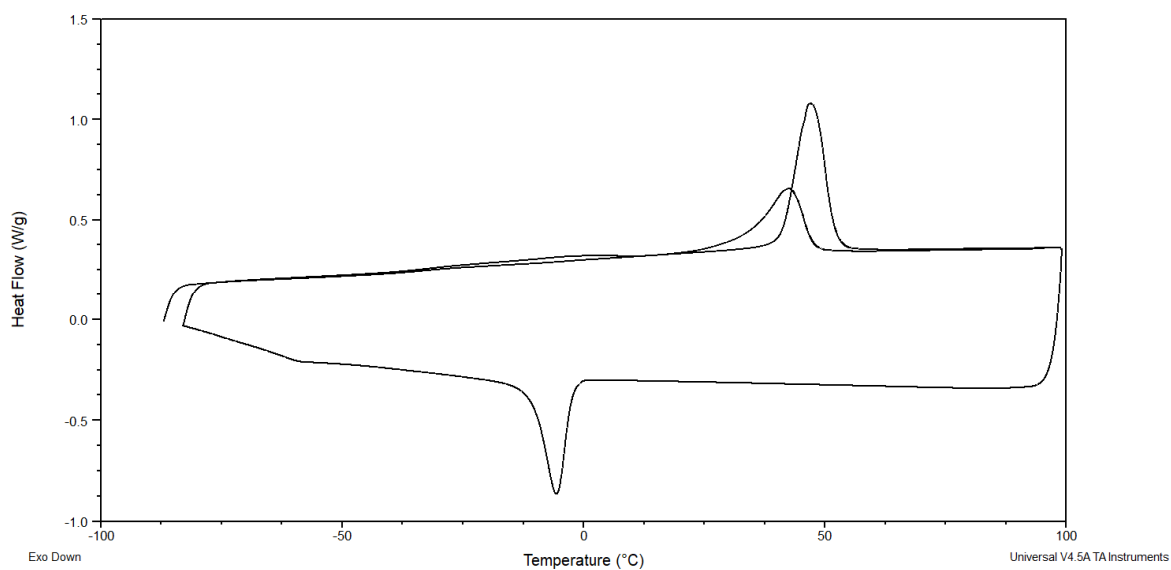

Figure S46 Heat Flow-Temperature curves for E\_PCUU3000\_2 poly(carbonate-urea-urethane).

### E\_PCUU3000\_1.5

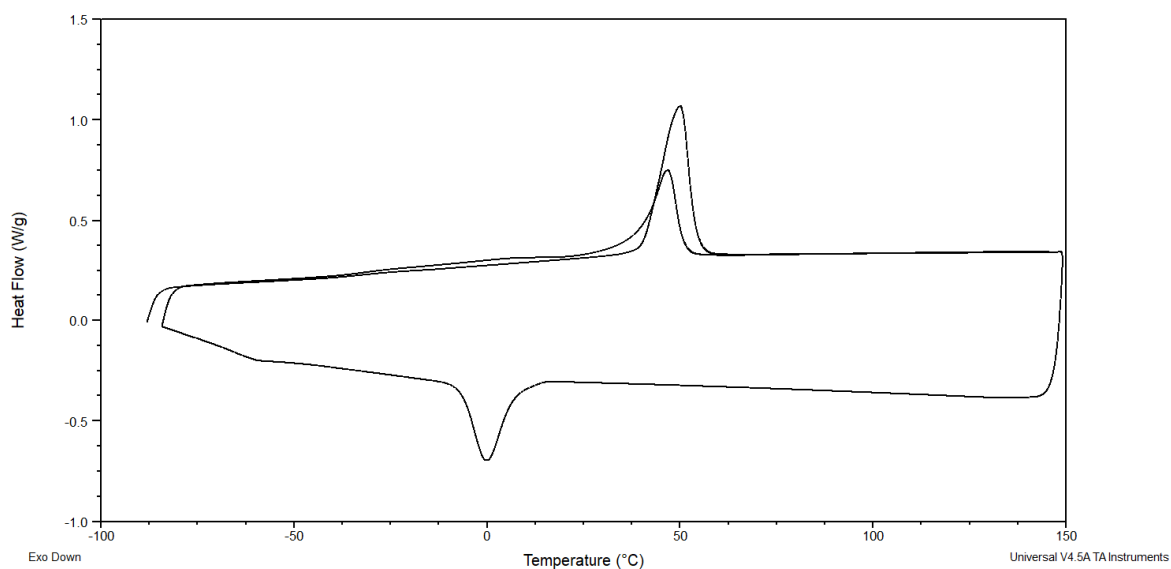

Figure S47 Heat Flow-Temperature curves for E\_PCUU3000\_1.5 poly(carbonate-urea-urethane).

### E\_PCUU3000\_1.2

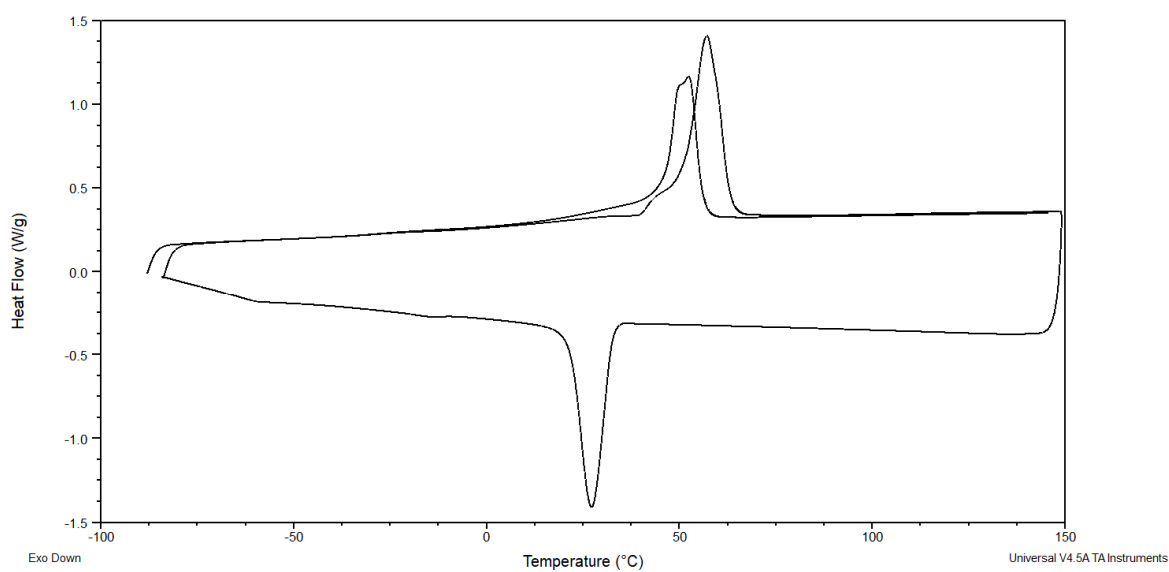

Figure S48 Heat Flow-Temperature curves for E\_PCUU3000\_1.2 poly(carbonate-urea-urethane).

### **E\_PCUU5000\_3**

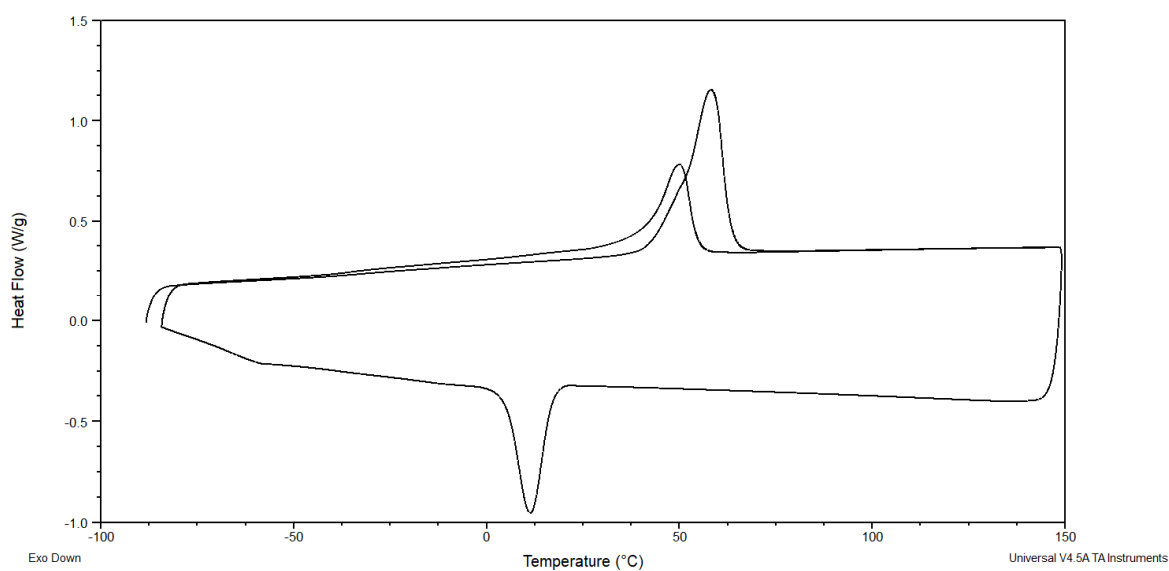

Figure S49 Heat Flow-Temperature curves for E\_PCUU5000\_3 poly(carbonate-urea-urethane).

### **E\_PCUU5000\_2**

X-axis – Heat Flow (W/g);

Y-axis – Temperature (°C)

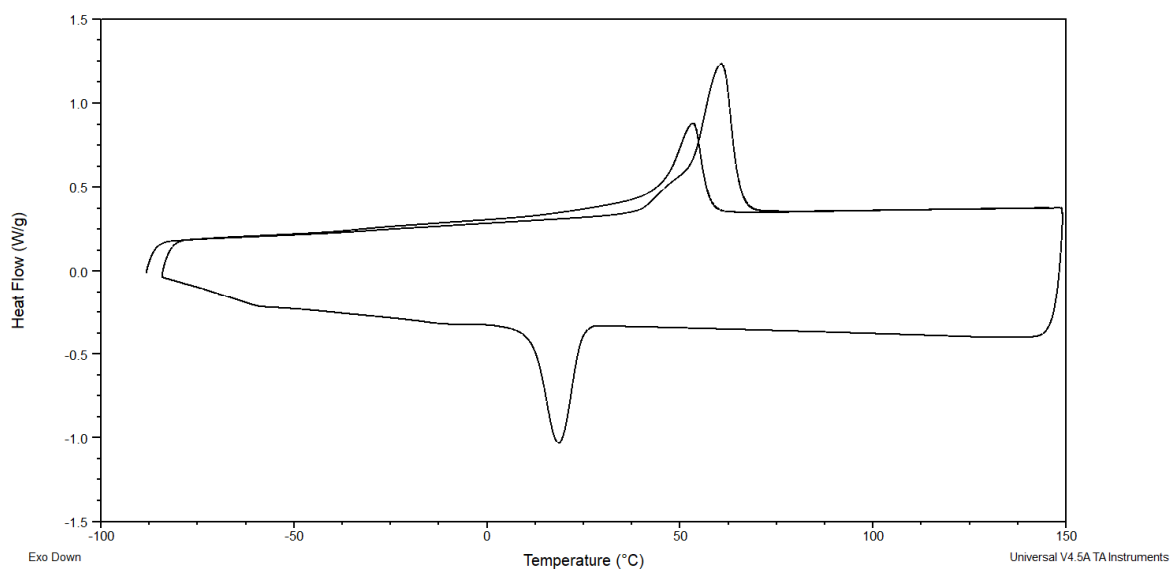

Figure S50 Heat Flow-Temperature curves for E\_PCUU5000\_2 poly(carbonate-urea-urethane).

### E\_OCD\_3000

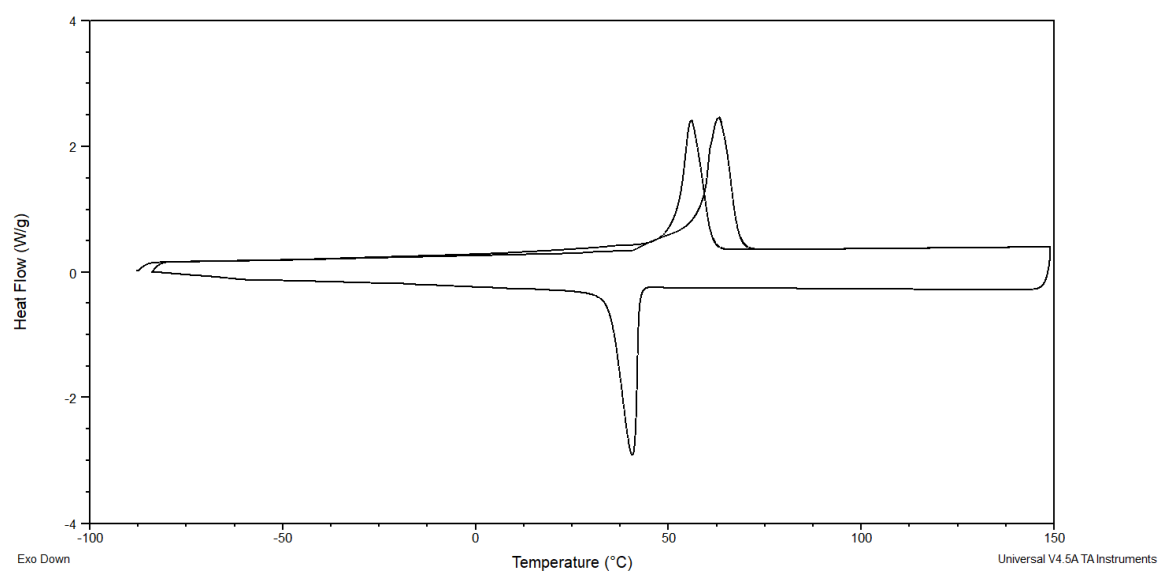

Figure S51 Heat Flow-Temperature curves for E\_OCD\_3000 oligocarbonate.

### E\_OCD\_5000

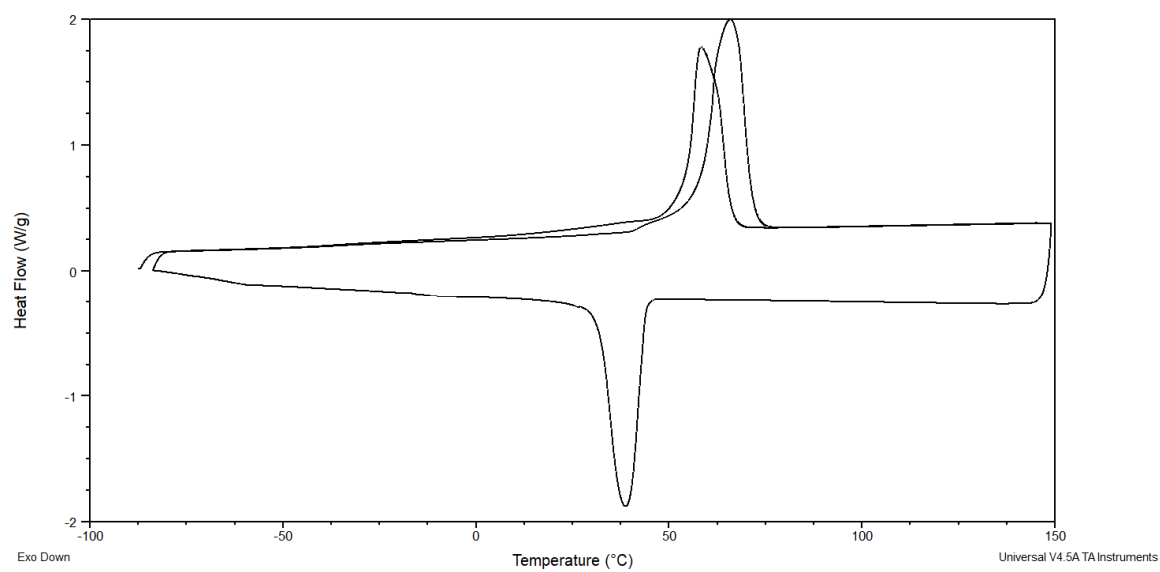

Figure S52 Heat Flow-Temperature curves for E\_OCD\_5000 oligocarbonate.

## E\_BMC\_8

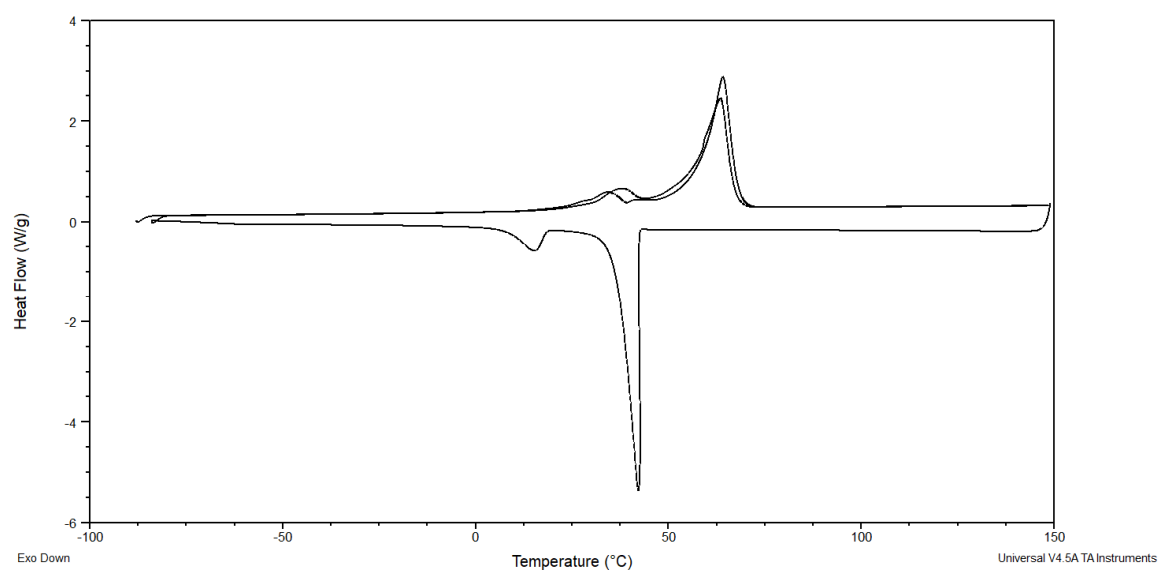

Figure S53 Heat Flow-Temperature curves for E\_BMC\_8 bis(methylcarbonate).

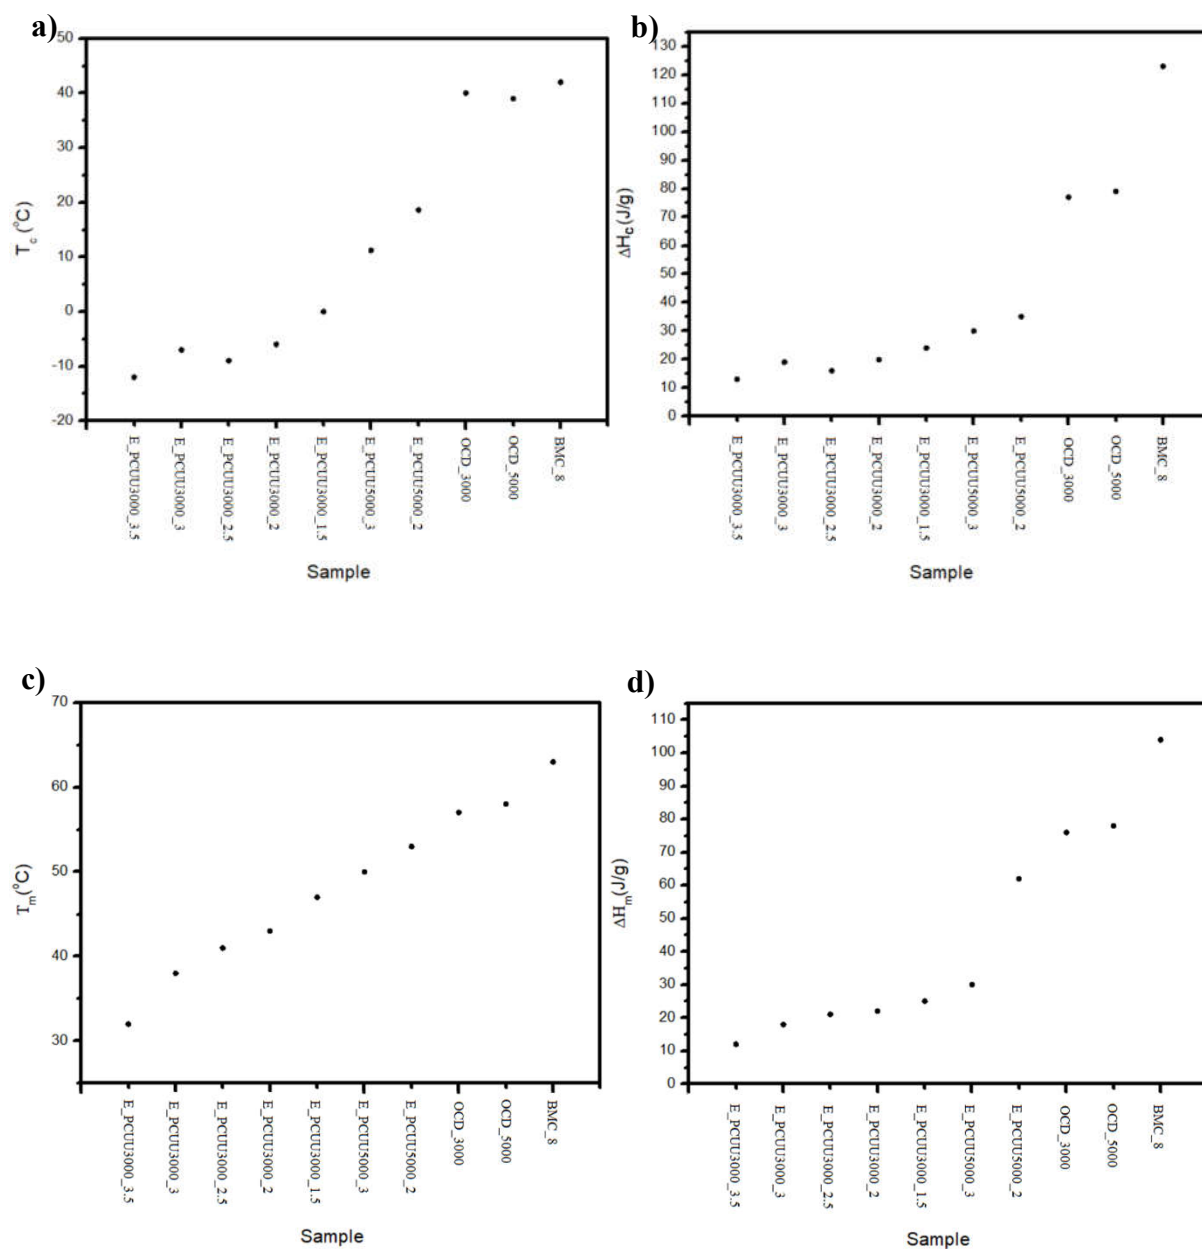

Figure S54 Thermal properties estimated from DSC measurements of poly(carbonate-urethanes-urea)s, oligocarbonate diol and alkylene bis(methylcarbonate): a) crystallization temperatures; b) crystallization enthalpies ; c) melting points; d) melting enthalpies.

## Dynamic mechanical thermal analyses (DMTA)

### E\_PCUI3000\_3.5

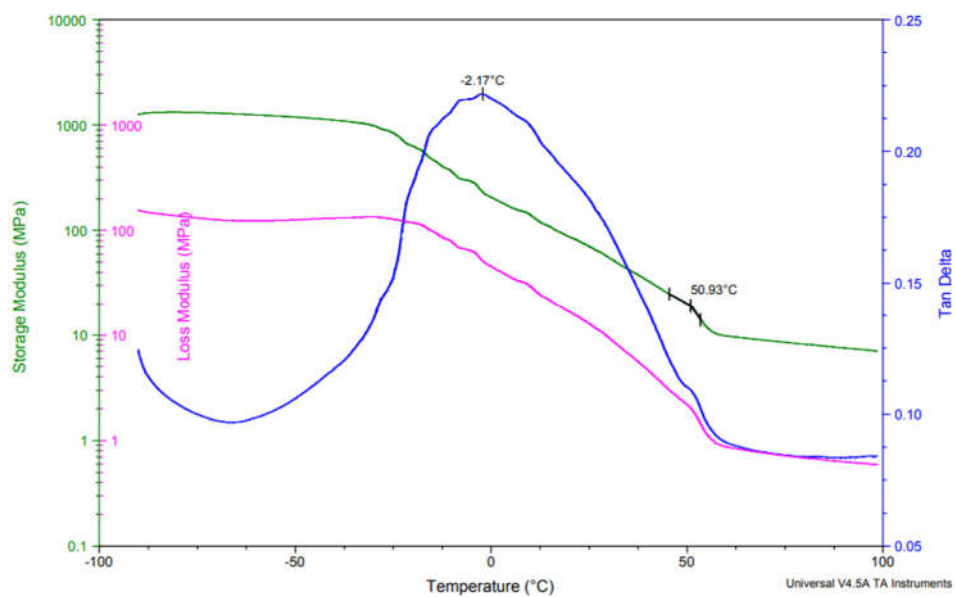

Figure S55 Dynamic mechanical thermal analysis for E\_PCUU3000\_3.5.

### E\_PCUU3000\_3

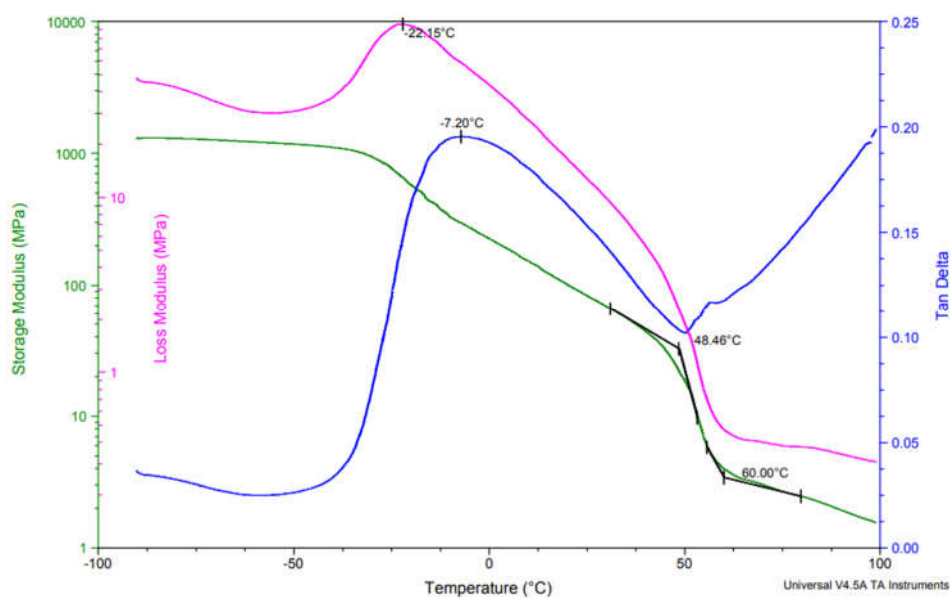

Figure S56 Dynamic mechanical thermal analysis for E\_PCUU3000\_3.

### E\_PCUU3000\_2.5

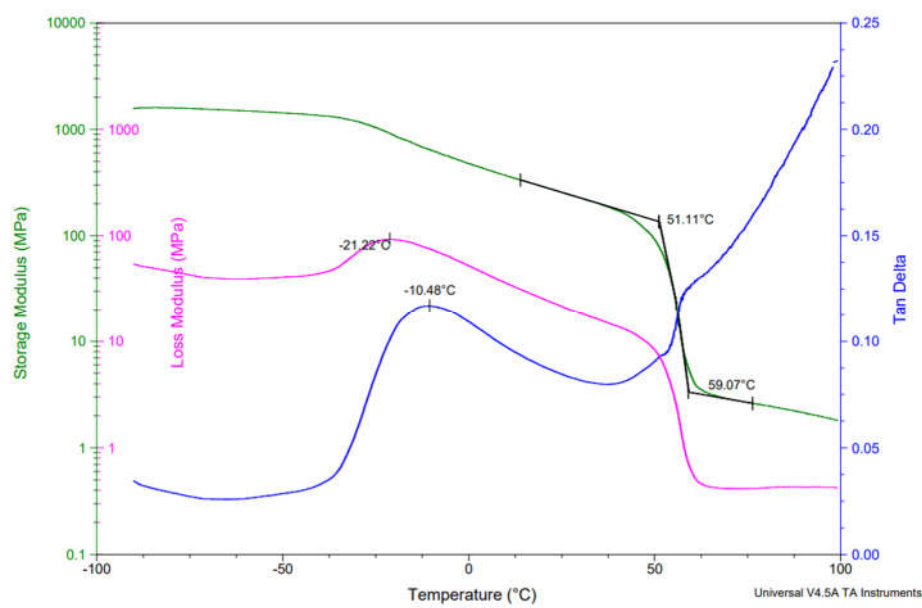

Figure S57 Dynamic mechanical thermal analysis for E\_PCUU3000\_2.5.

## E\_PCUU3000\_2

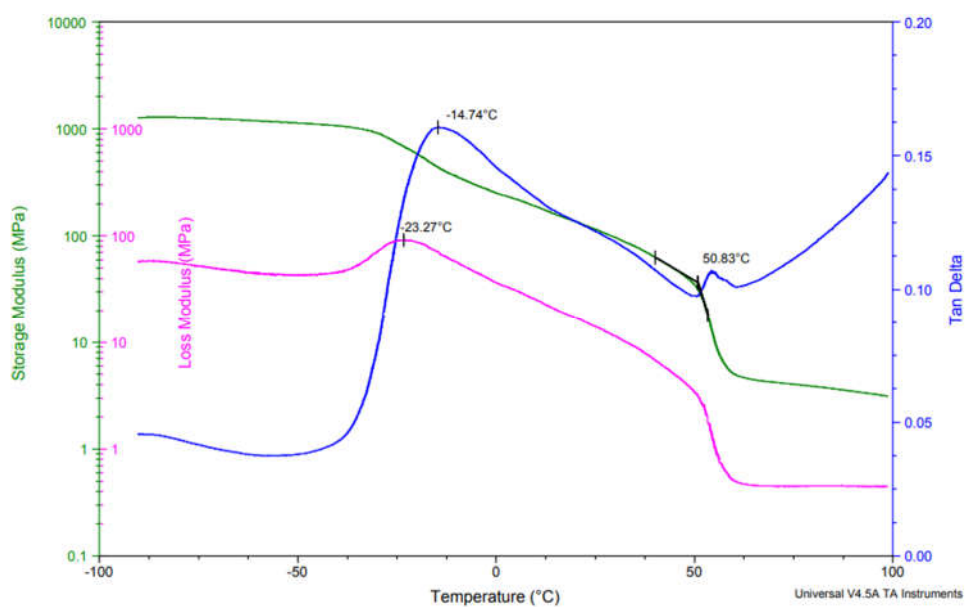

Figure S58 Dynamic mechanical thermal analysis for E\_PCUU3000\_2.

## E\_PCUU3000\_1.5

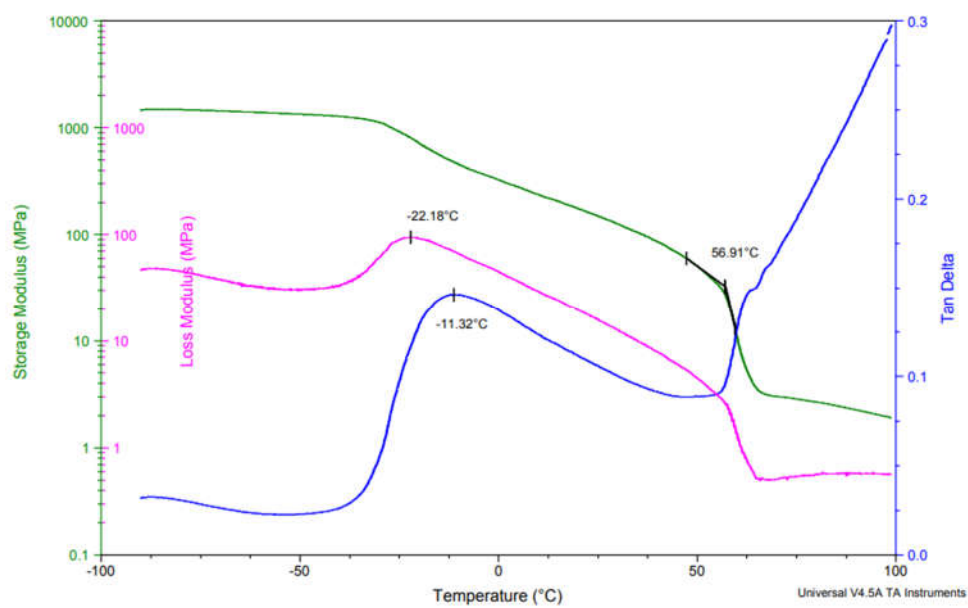

Figure S59 Dynamic mechanical thermal analysis for E\_PCUU3000\_1.5.

### E\_PCUU5000\_3

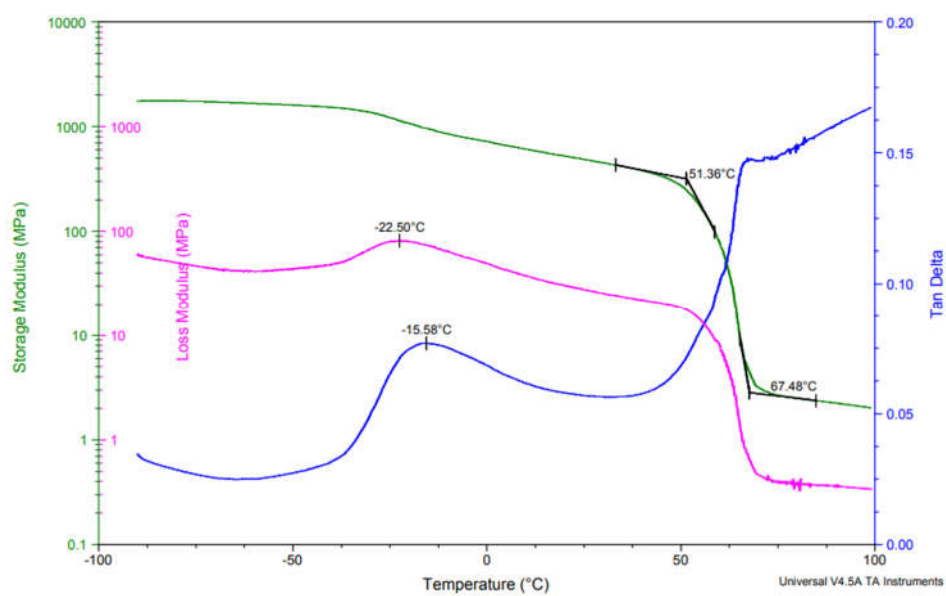

Figure S60 Dynamic mechanical thermal analysis for E\_PCUU5000\_3.

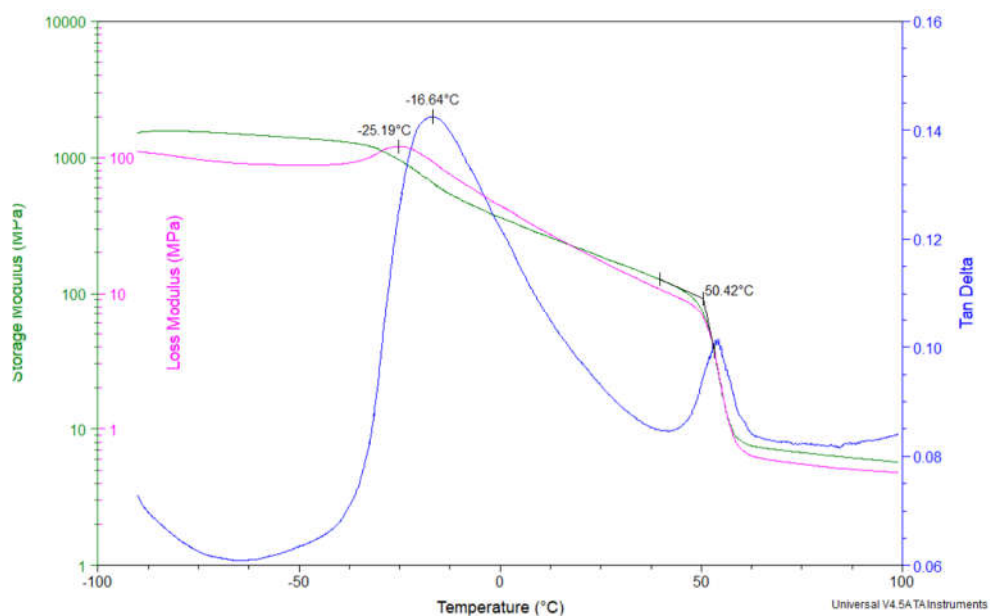

Figure S61 Dynamic mechanical thermal analysis for E\_PCUU5000\_2.

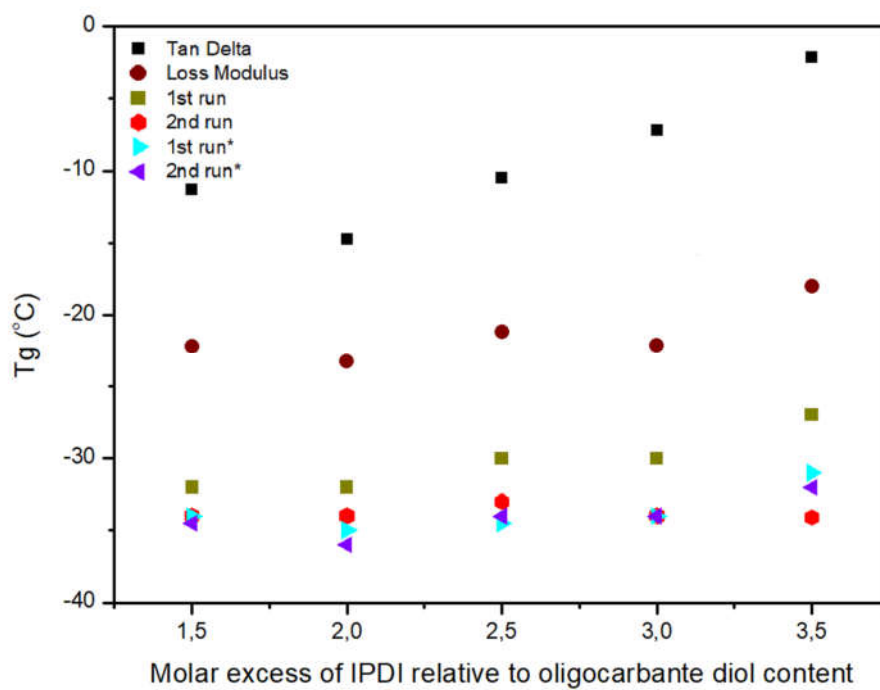

Figure S62 Glass transition temperatures estimated from DMA and MDSC measurements for PCUUs based on 3000g/mol OCD.

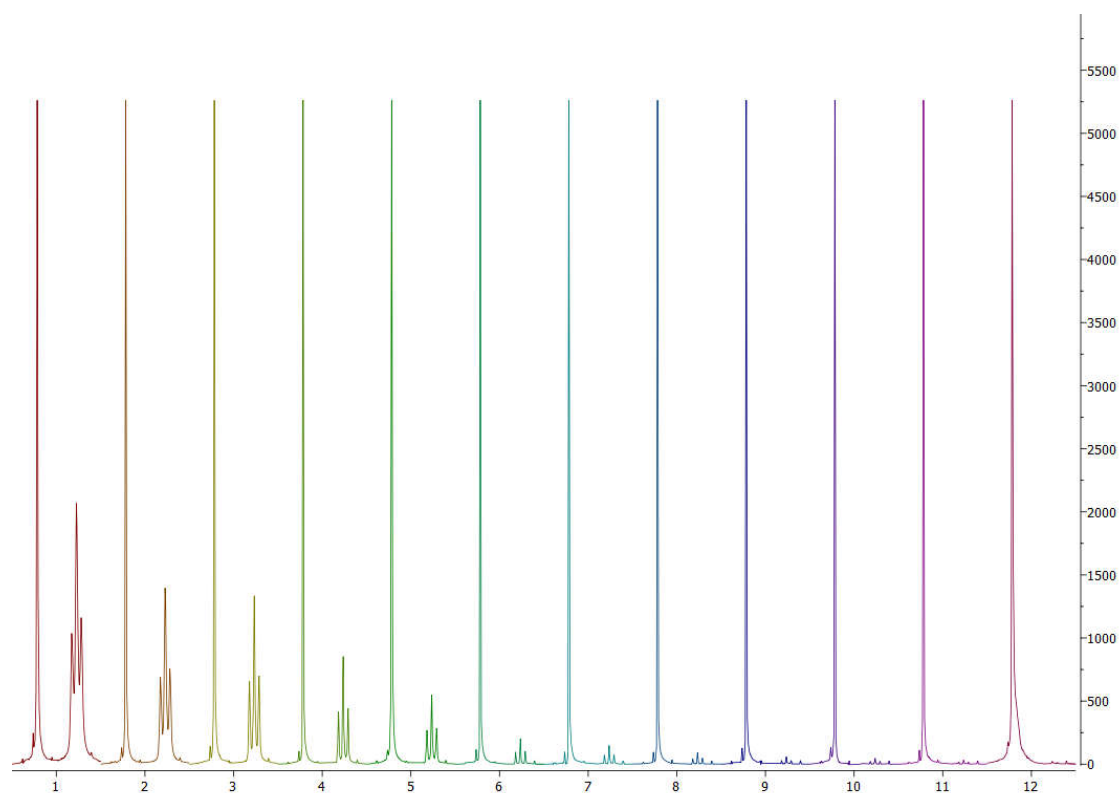

Figure S63  $^1\text{H}$  NMR stack of spectra for the region from 3.85 ppm to 3.55 ppm illustrating the progress of conversion for E\_BCM\_10 with 20 minutes sampling intervals.
